1  
2  
3  
4  
5  
6  
7  
8  
9  
10  
11  
12  
13  
14  
15  
16  
17  
18  
19  
20  
21  
22  
23

**Neuronal hyperexcitability is a DLK-dependent trigger of HSV-1 reactivation that  
can be induced by IL-1**

Sean Cuddy<sup>1,2#</sup>, Austin R. Schinlever<sup>1#</sup>, Sara Dochnal<sup>1</sup>, Jon Suzich<sup>1</sup>, Parijat Kundu<sup>1</sup>,  
Taylor K. Downs<sup>3</sup>, Mina Farah<sup>1</sup>, Bimal Desai<sup>3</sup>, Chris Boutell<sup>4</sup> and Anna R. Cliffe<sup>1\*</sup>

1. Department of Microbiology, Immunology and Cancer Biology, University of  
Virginia, Charlottesville, VA, 22908.

2. Neuroscience Graduate Program, University of Virginia, Charlottesville, VA,  
22908

3. Department of Pharmacology, University of Virginia, Charlottesville, VA, 22908.

4. MRC-University of Glasgow Centre for Virus Research (CVR), Garscube  
Campus, Glasgow, Scotland, United Kingdom

# Denotes equal contribution

\* Correspondence to Anna R. Cliffe, [cliffe@virginia.edu](mailto:cliffe@virginia.edu)

24

25 Abstract

26 Herpes Simplex Virus (HSV) establishes a latent infection in neurons and  
27 periodically reactivates to cause recurrent disease. The stimuli that act on neurons to  
28 trigger HSV reactivation have not been fully elucidated. Here we demonstrate that HSV  
29 reactivation is triggered by stimuli that induce neuronal hyperexcitability. Neuronal  
30 stimulation-induced reactivation was dependent on voltage-gated ion and  
31 hyperpolarization-activated cyclic nucleotide-gated (HCN) channels, demonstrating that  
32 neuronal activity is required for HSV reactivation. Hyperexcitability-induced reactivation  
33 was dependent on the neuronal specific pathway of DLK/JNK activation and progressed  
34 via an initial wave of viral gene expression that was independent of histone  
35 demethylase activity and linked to increased levels of histone phosphorylation. IL-1 $\beta$   
36 induces neuronal hyperexcitability and is released under conditions of psychological  
37 stress and fever; both known triggers of clinical HSV reactivation. IL-1 $\beta$  treatment of  
38 sympathetic neurons induced histone phosphorylation, and importantly HSV  
39 reactivation, which was dependent on both DLK and neuronal excitability. Thus, HSV  
40 co-opts an innate immune pathway resulting from IL-1 stimulation of sympathetic  
41 neurons to induce reactivation from latency.

42

43

## 44 Introduction

45           Herpes simplex virus-1 (HSV-1) is a ubiquitous human pathogen that is present  
46 in approximately 40-90% of the population worldwide<sup>1</sup>. HSV-1 persists for life in the  
47 form of a latent infection in neurons, with intermittent episodes of reactivation.  
48 Reactivation from a latent infection and subsequent replication of the virus can cause  
49 substantial disease including oral and genital ulcers, herpes keratitis and encephalitis.  
50 In addition, multiple studies have linked persistent HSV-1 infection to the progression of  
51 Alzheimer's disease<sup>2</sup>. Stimuli in humans that are linked with clinical HSV-1 reactivation  
52 include exposure to UV light, psychological stress, fever and changes in hormone  
53 levels<sup>3</sup>. How these triggers result in reactivation of latent HSV-1 infection is not fully  
54 understood.

55  
56           During a latent infection of neurons, there is evidence that the viral genome is  
57 assembled into a nucleosomal structure by associating with cellular histone proteins<sup>4</sup>.  
58 The viral lytic promoters have modifications that are characteristic of silent  
59 heterochromatin (histone H3 di- and tri-methyl lysine 9; H3K9me2/3, and H3K27me3)<sup>5-8</sup>,  
60 which is thought to maintain long-term silencing of the viral lytic transcripts. Hence, for  
61 reactivation to occur, viral lytic gene expression is induced from promoters that are  
62 assembled into heterochromatin and in the absence of viral proteins, such as VP16,  
63 which are important for lytic gene expression upon *de novo* infection. Reactivation is  
64 therefore dependent on the host proteins and the activation of cellular signaling  
65 pathways<sup>3</sup>. However, the full nature of the stimuli that can act on neurons to trigger

66 reactivation and the mechanisms by which expression of the lytic genes occurs have  
67 not been elucidated.

68

69 One of the best characterized stimuli of HSV reactivation at the cellular level is  
70 nerve-growth factor (NGF) deprivation resulting from loss of PI3K/AKT activity<sup>9-11</sup>.  
71 Previously, we found that activation of activation of the c-Jun N-terminal kinase (JNK)  
72 cell stress response via activation of dual leucine zipper kinase (DLK) was required for  
73 reactivation in response to loss of NGF signaling. In addition, recent work has identified  
74 a role for JNK in HSV reactivation following perturbation of the DNA damage/repair  
75 pathways, which also trigger reactivation via inhibition of AKT activity<sup>12</sup>. DLK is a master  
76 regulator of the neuronal stress response, and its activation can result in cell death,  
77 axon pruning, axon regeneration or axon degeneration depending on the nature of  
78 activating trigger<sup>13,14</sup>. Therefore, it appears that HSV has coopted this neuronal stress  
79 pathway of JNK activation by DLK to induce reactivation. One key mechanism by which  
80 JNK functions to promote lytic gene expression is via a histone phosphorylation on S10  
81 of histone H3<sup>15</sup>. JNK-dependent histone phosphorylation occurs on histone H3 that  
82 maintains K9 methylation and is therefore known as a histone methyl/phospho switch,  
83 which permits transcription without the requirement for recruitment of histone  
84 demethylases<sup>16,17</sup>. This initial wave of viral lytic gene expression is known as Phase I,  
85 and also occurs independently of the lytic transactivator VP16. In addition, late gene  
86 expression in Phase I occurs independent of viral genome replication<sup>18,19</sup>. A sub-  
87 population of neurons then progress to full reactivation (also known as Phase II), which  
88 occurs 48-72h post-stimulus and requires both VP16 and histone demethylase activity

89 <sup>15,20-23</sup>. However, not all models of reactivation appear to go through this bi-phasic  
90 progression to reactivation as axotomy results in more rapid viral gene expression and  
91 dependence on histone demethylase activity for immediate viral gene expression.

92  
93         The aim of this study was to determine if we could identify novel triggers of HSV  
94 reactivation and determine if they involved a bi-phasic mode of reactivation. We decided  
95 to focus on stimuli that cause heightened neuronal activity because hyperstimulation of  
96 cortical neurons following forskolin treatment or potassium chloride mediated  
97 depolarization has previously been found to result in a global histone methyl/phospho  
98 switch<sup>24</sup>. Whether this same occurs in different types of neurons, including sympathetic  
99 neurons, is not known. Although forskolin has previously been found to induce HSV  
100 reactivation,<sup>25-28</sup>, whether this is a result of inducing hyperexcitability or as a  
101 consequence of activation of alternative cAMP-responsive proteins including PKA and  
102 CREB is not known. Therefore, we investigated if forskolin-mediated reactivation was a  
103 result of increased neuronal activity. Hyperexcitability of neurons is correlated with  
104 changes in cellular gene expression, increased DNA damage<sup>29,30</sup> and epigenetic  
105 changes including H3 phosphorylation<sup>24</sup>. However, DLK-mediated activation of JNK has  
106 not been linked to changes in cellular gene expression in response to hyperexcitability.  
107 Therefore, we were also interested in determining whether DLK and JNK are required  
108 for induction of HSV gene expression in response to hyperexcitability.

109  
110         IL-1 $\beta$  is released under conditions of psychological stress and fever<sup>31-34</sup>; both  
111 known triggers of clinical HSV reactivation<sup>35-38</sup>. IL-1 $\beta$  has previously been found to

112 induce heightened neuronal activity<sup>39-41</sup>. However, an intriguing feature of IL-1 $\beta$   
113 signaling is its ability to have differential effects on different cell types. For example, IL-  
114 1 $\beta$  is involved extrinsic immune response to infection via activation of neutrophils and  
115 lymphocytes. In addition, it can act on non-immune cells including fibroblasts to initiate  
116 an antiviral response<sup>42,43</sup>, as has previously been described for lytic infection with HSV-  
117 1<sup>42</sup>. Given these differential downstream responses to IL-1 $\beta$  signaling, we were  
118 particularly interested in the effects of IL-1 $\beta$  treatment of latently infected neurons.  
119 Interestingly, we found that IL-1 $\beta$  was capable of inducing reactivation of HSV from  
120 mature sympathetic neurons. Inhibition of voltage-gated sodium and hyperpolarization  
121 activated cyclic nucleotide gated (HCN) channels prevented reactivation mediated by  
122 both forskolin and IL-1 $\beta$ . Activity of the cell stress protein DLK was also essential for IL-  
123 1 $\beta$ -mediated reactivation. We therefore identify IL-1 $\beta$  as a novel trigger from HSV  
124 reactivation that acts via neuronal hyperexcitability and highlight the central role of JNK  
125 activation by DLK in HSV reactivation.

126

## 127 **Results**

### 128 Adenylate Cyclase Activation Triggers DLK/JNK-Dependent Reactivation of HSV from 129 Latent Infection in Sympathetic Neurons

130 Both forskolin and cAMP mimetics are well known to induce neuronal  
131 hyperexcitation and have previously also been found to trigger HSV reactivation<sup>25-28</sup>.  
132 Using a model of HSV latency in mouse sympathetic neurons isolated from the super-  
133 cervical ganglia (SCG)<sup>15</sup> we investigated whether forskolin treatment induced  
134 reactivation in this system and the potential mechanism resulting in the initial induction

135 of viral lytic gene expression. Sympathetic SCG neurons were infected with a Us11-  
136 GFP tagged HSV-1<sup>44</sup> at a multiplicity of infection (MOI) of 7.5 PFU/cell in the presence  
137 of acyclovir (ACV). After 6 days the ACV was washed out and the neuronal cultures  
138 monitored to ensure that no GFP-positive neurons were present. Two days later,  
139 reactivation was triggered by addition of forskolin (Figure 1A). As represented in figure  
140 1B, forskolin can act either extra-cellularly on ion channels or intracellularly to activate  
141 adenylate cyclase<sup>45-47</sup>. Dideoxy-forskolin is a cell impermeable forskolin analog that can  
142 act directly on voltage gated ion channels but does not activate cAMP<sup>45,48</sup>. We found  
143 addition of forskolin but not dideoxy-forskolin triggered HSV reactivation (Figure 1C). In  
144 addition, treatment of latently infected primary neurons with a cAMP mimetic (8-bromo-  
145 cAMP) was sufficient to trigger reactivation (Figure 1D) and inhibition of adenylate  
146 cyclase activity using SQ22, 536<sup>49</sup> significantly diminished HSV reactivation (Figure 1E).  
147 Therefore, activation of adenylate cyclase activation and subsequent increased  
148 intracellular levels of cAMP are required for forskolin-mediated reactivation.

149

### 150 DLK/JNK Activity is Required for the Early Phase of Viral Gene Expression in Response 151 to Forskolin Treatment

152 We previously found that DLK-mediated JNK activation was essential for Phase I  
153 reactivation following interruption of nerve growth factor signaling. To determine  
154 whether DLK and JNK activation were crucial for reactivation in response to  
155 hyperexcitability, neurons were reactivated with forskolin in the presence of the JNK-  
156 inhibitor SP600125 (Fig. 2A) or the DLK inhibitor GNE-3511<sup>50</sup> (Fig. 2B), which  
157 prevented reactivation based on the number of GFP-positive neurons at 3-days post-

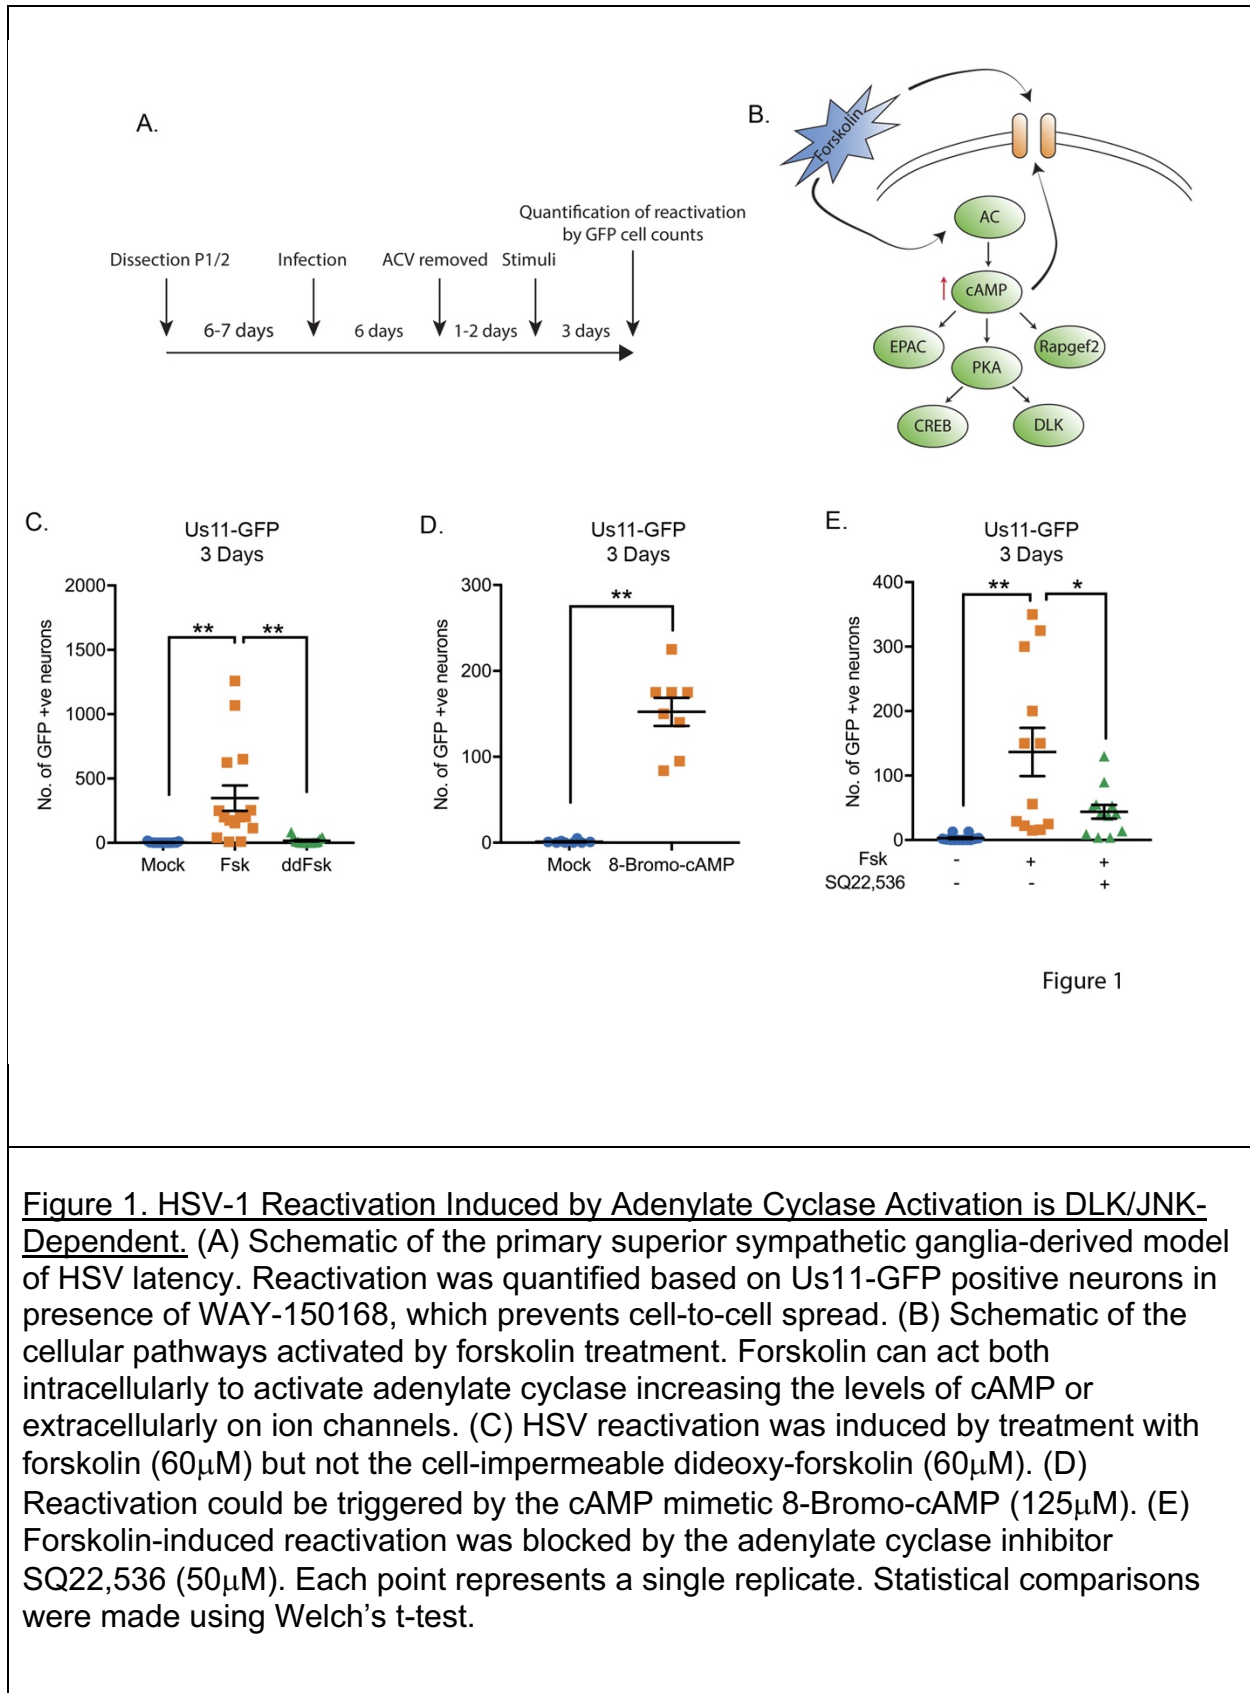



158 reactivation Inhibition of either JNK or DLK blocked HSV reactivation in response to  
159 forskolin. These data therefore indicate hyperexcitability-induced reactivation is  
160 dependent on the neuronal stress pathway mediated by DLK activation of JNK.

161

162 Because we previously found that JNK-activation results in a unique wave of viral  
163 gene expression in response to inhibition of nerve-growth factor signaling, we especially  
164 intrigued to determine whether hyperexcitability triggers a similar wave of JNK  
165 dependent viral gene expression. The previously described bi-phasic progression to  
166 viral reactivation is characterized by viral DNA replication and production of infectious  
167 virus, occurring around 48-72 post-stimulus<sup>18</sup>, but an earlier wave of lytic gene  
168 expression occurring around 20h post-stimulus. To determine whether forskolin-  
169 mediated reactivation results in a similar kinetics of reactivation, we investigated the  
170 timing of Us11-GFP synthesis, viral DNA replication, production of infectious virus and  
171 lytic gene induction following forskolin treatment. In response to forskolin treatment,  
172 GFP synthesis in neurons started to appear around 48h post-reactivation, with more  
173 robust reactivation observed at 72h (Figure 2C). In contrast to forskolin-mediated  
174 reactivation, the number of GFP-positive neurons following superinfection with a  
175 replication competent wild-type virus resulted in a rapid induction of GFP-positive  
176 neurons by 24h post-superinfection (Figure 2C). Therefore, forskolin triggered  
177 reactivation results in slower synthesis of Us11-GFP than superinfection. In addition,  
178 these data highlight the ability of forskolin to trigger reactivation from only a  
179 subpopulation of latently infected neurons (approximately 1 in every 3.4 neurons  
180 compared to superinfection).

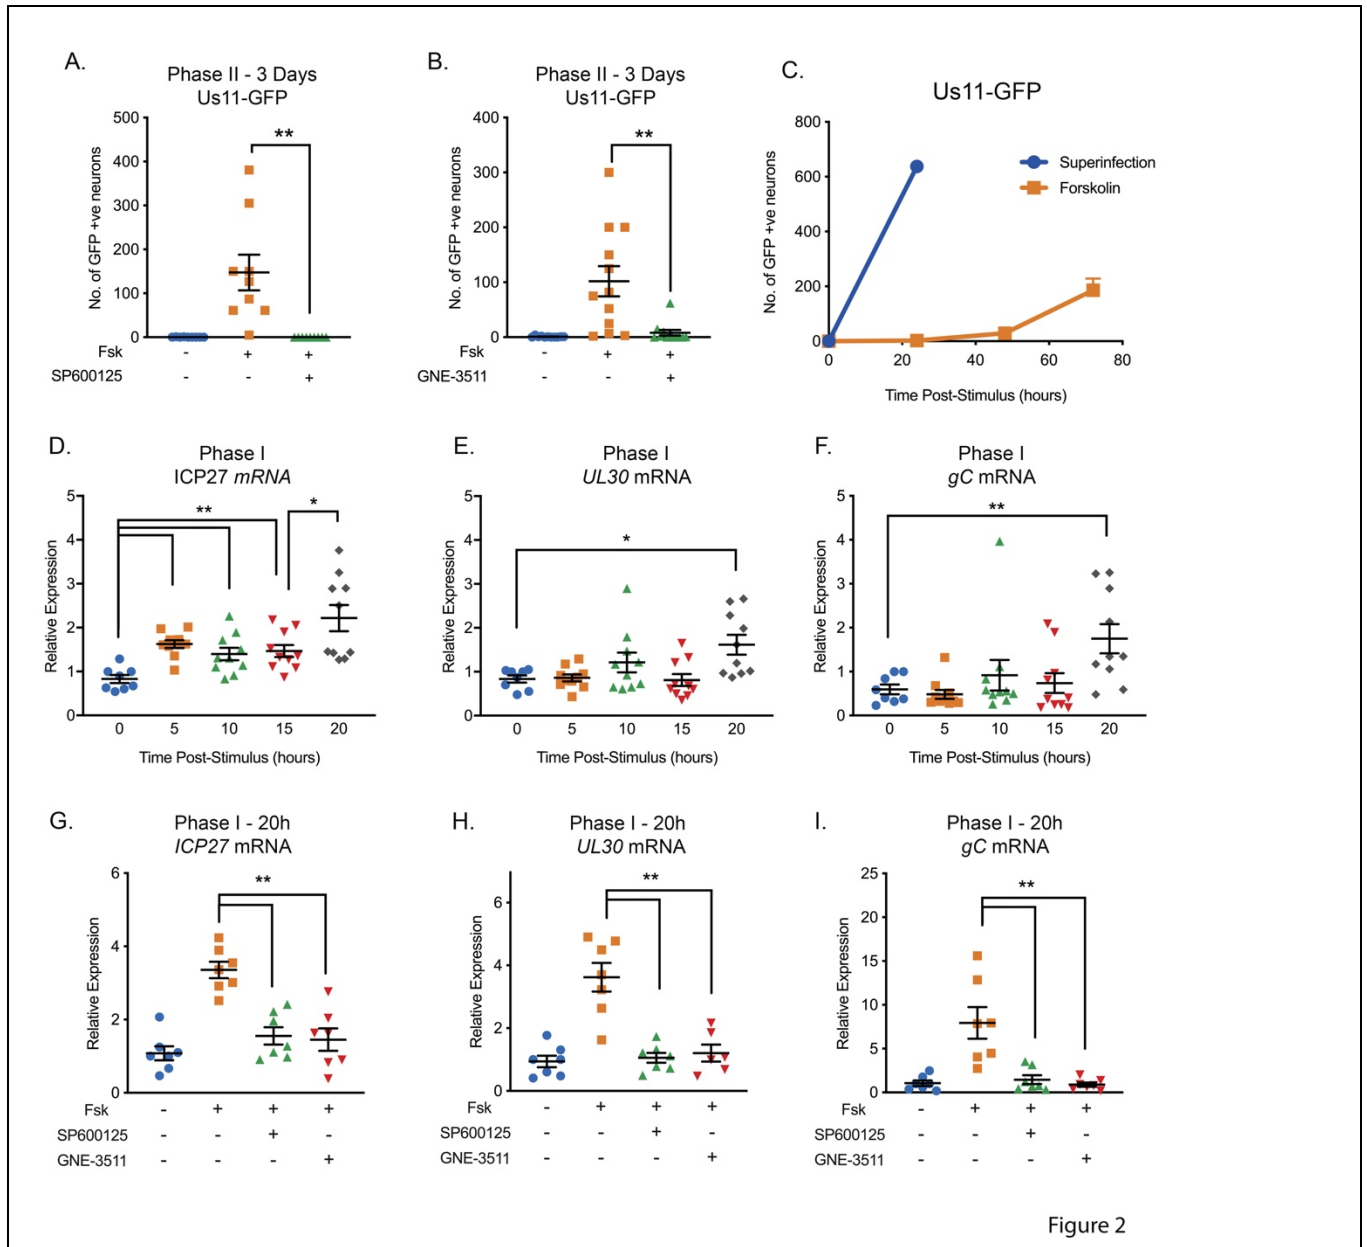

Figure 2

**Figure 2. Reactivation Triggered by Forskolin Involves a DLK/JNK Dependent Phase I of Viral Gene Expression.**

(A) Reactivation was induced by forskolin in the presence of JNK inhibitor SP600125 (20 $\mu$ M). (B) Reactivation was induced by forskolin in the presence of the DLK inhibitor GNE-3511 (4 $\mu$ M). (C) Reactivation was induced by forskolin or superinfection with a wild-type (F strain) HSV-1 (MOI of 10 PFU/cell) and qualified based on Us11-GFP positive neurons (n=3). (D-F) RT-qPCR for viral mRNA transcripts following forskolin treatment of latently infected SCGs. (G-I) RT-qPCR for viral lytic transcripts at 20h post-forskolin treatment and then in presence of the JNK inhibitor SP600125 (20 $\mu$ M) and the DLK inhibitor GNE-3511 (4 $\mu$ M). In D-L each experimental replication is represented. Statistical comparisons were made using two-tailed paired student's t-test.

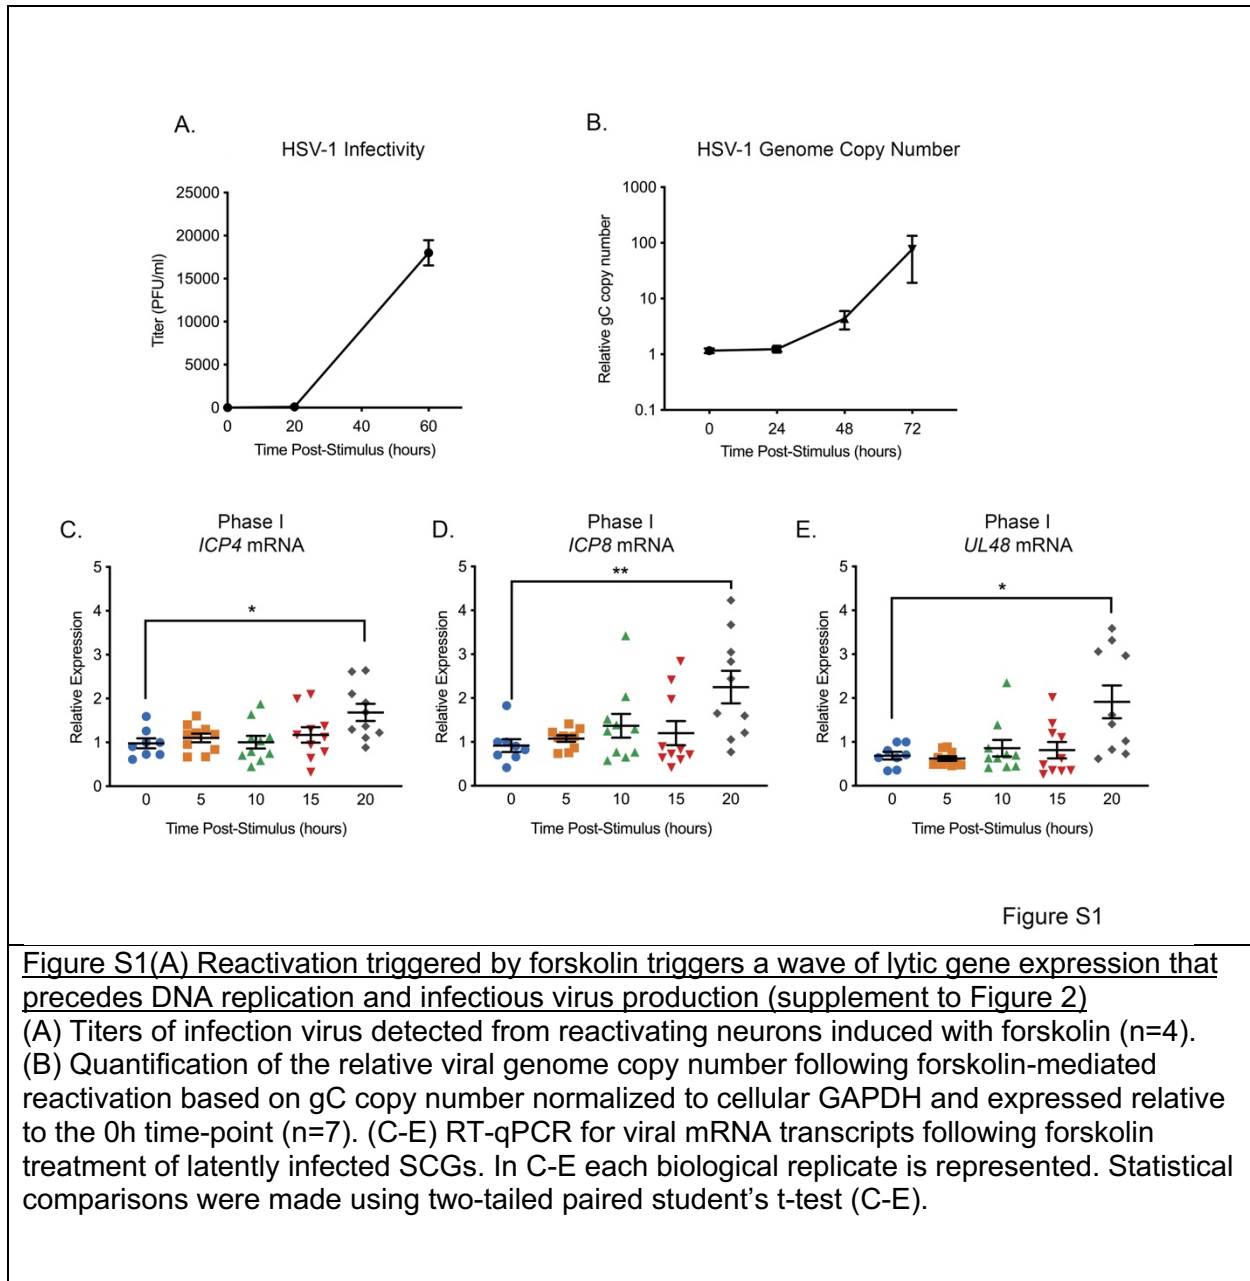

183

184

185           The production of infectious virus also mirrored the data for the detection of  
186 Us11-GFP positive neurons, with a robust increase in viral titers between 24 and 60h  
187 post-stimulus (Figure S1A). An increase in viral genome copy was also not detected  
188 until 48h post-stimulus, which continued between 48h and 72h (Figure S1B). The  
189 quantification of viral genome copy number was also carried out in presence of WAY-  
190 150138<sup>51</sup>, which prevents packaging of the viral genome<sup>52</sup>, therefore indicating that  
191 DNA replication occurs in reactivating neurons and not as a consequence of cell-to-cell  
192 spread.

193  
194           Given the observed 48h delay in viral DNA replication and production of  
195 infectious virus, we were interested to determine if there was a Phase I wave of lytic  
196 gene expression that occurred prior to viral DNA replication. We therefore carried out  
197 RT-qPCR to detect representative immediate-early (*ICP27* and *ICP4*), early (*ICP8* and  
198 *UL30*) and late (*UL48* and *gC*) transcripts between 5- and 20-hours post addition of  
199 forskolin (Figures 2D-F and S1C-E). For all six transcripts, a significant up-regulation of  
200 mRNA occurred at 20h post-treatment, including the true late gene *gC*, whose  
201 expression would usually only be stimulated following viral genome replication in the  
202 context of *de novo* lytic replication. Therefore, this indicates that lytic gene expression is  
203 induced prior to viral DNA replication and that neuronal hyperexcitability does trigger a  
204 Phase I wave of lytic gene expression. Notably, we did detect small but reproducible  
205 induction of *ICP27* mRNA at 5h post-stimulus, followed by a second induction at 20h  
206 (Figure 2D), indicating that there is likely differential regulation of some viral lytic

207 transcripts during Phase I reactivation induced by hyperexcitability that is distinct from  
208 both NGF-deprivation and *de novo* lytic infection.

209

210 To determine whether JNK and DLK were required Phase I gene expression in  
211 response to hyperexcitability, we investigated viral mRNA levels following forskolin-  
212 mediated reactivation in the presence of the JNK inhibitor SP600125. We found a  
213 significant reduction in *ICP27* (2.2-fold), *UL30* (3.3-fold) and *gC* (5.5-fold) mRNA levels  
214 at 20h post-stimulus in the presence of SP600125 (Figure 2J-L). For all genes tested,  
215 there was no significant increase in mRNAs in the JNK-inhibitor treated neurons  
216 compared to mock. We observed comparable results following treatment with the DLK  
217 inhibitor GNE-3511, with a 2.3-, 3-, 8.8-fold decrease in *ICP27*, *UL30* and *gC* mRNAs  
218 respectively compared to forskolin treatment alone, and no significant increase in  
219 mRNA levels compared to the reactivated samples (Figure 2J-L).

220

221 It is possible that in addition to JNK, other signal transduction proteins are  
222 important in forskolin-mediated reactivation. Previous data has found that DLK can be  
223 activated by PKA, which is well known to be activated by cAMP. However, using well  
224 characterized inhibitors of PKA, along with the PKA-activated transcription factors  
225 CREB, in addition to two other cAMP responsive proteins Rapgef2 and EPAC, we did  
226 not find that these cAMP activated proteins were required for Phase I reactivation  
227 (Figure S2). Inhibition of PKA or CREB did reduce Phase II reactivation (Figure S2A  
228 and C) but had no effect on Phase I (Figure S2B and D). Inhibition of Rapgef2 or PEAC  
229 had no effect on HSV reactivation (Figure SE and F). Taken together, these data

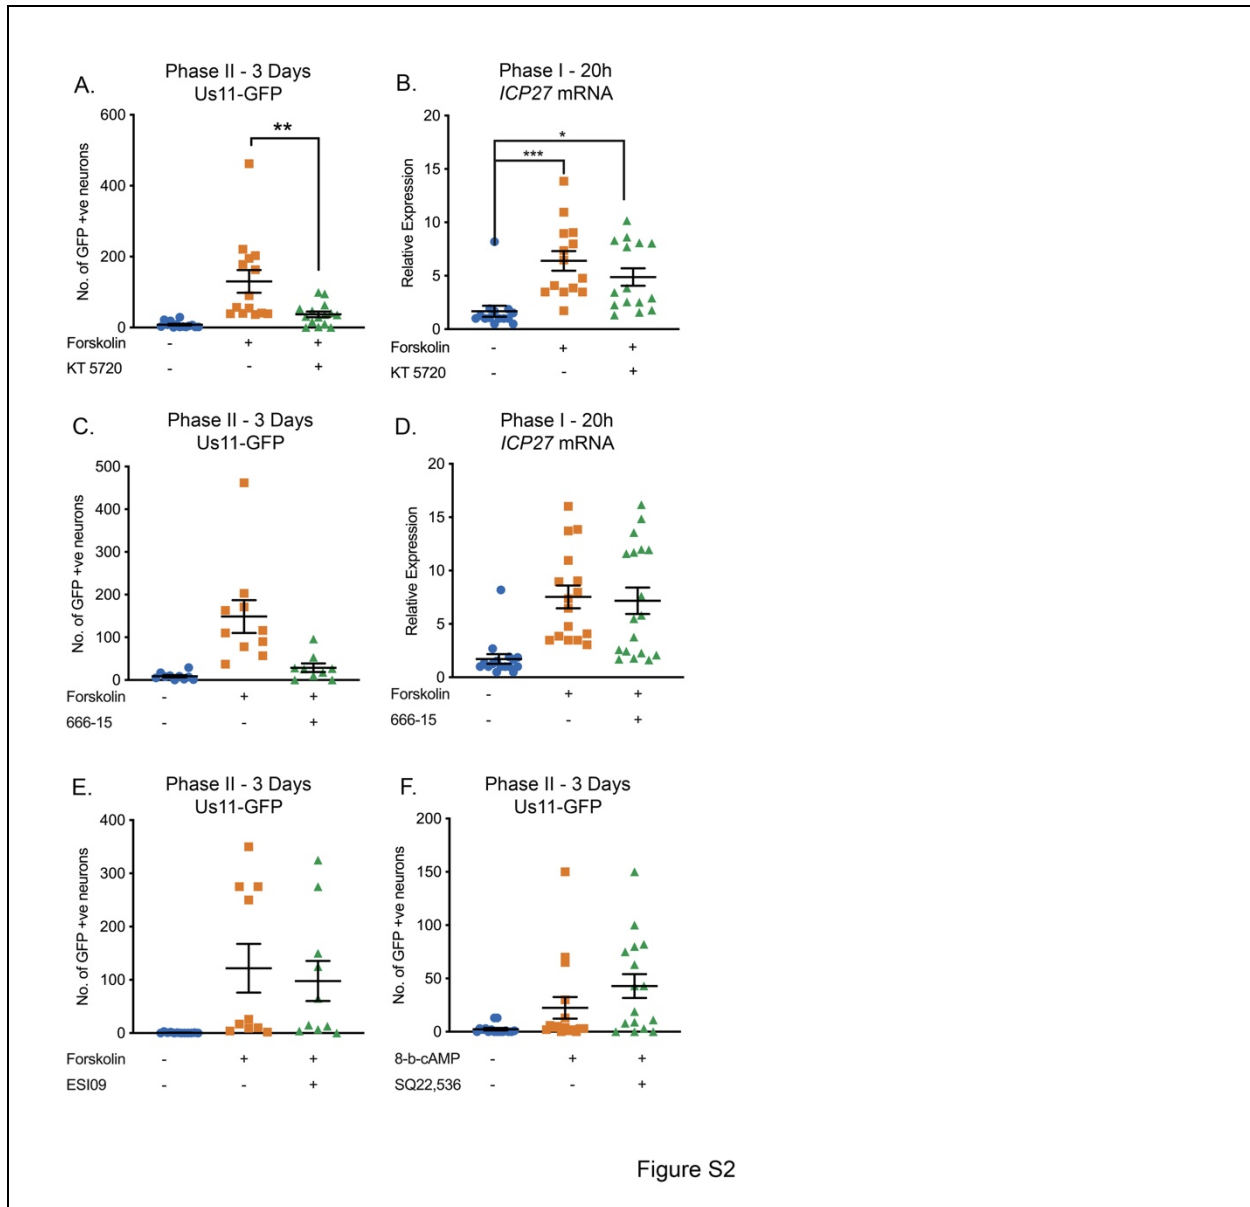

Figure S2

**Figure S2. Effect of PKA, CREB, Rapgef2 and EPAC Inhibition on HSV-1 Reactivation.** (A) Latently infected cultures were reactivated with forskolin (60  $\mu$ M) in the presence of the PKA inhibitor KT 5720 (3  $\mu$ M) and the number of Us11-GFP positive neurons quantified at 3 days post-reactivation. (B) RT-qPCR for the viral lytic transcript ICP27 at 20h post-forskolin treatment and in the presence of KT 5720. (C) Latently infected cultures were reactivated with forskolin in the presence of the CREB inhibitor 666-15 (2  $\mu$ M). (D) RT-qPCR for ICP27 at 20h post-forskolin treatment and in the presence of 666-15. (E) Latently infected cultures were reactivated with forskolin (60 $\mu$ M) in the presence of the EPAC inhibitor ESI09 (10  $\mu$ M). (F) Latently infected cultures were reactivated with 8-Bromo-cAMP (125 $\mu$ M) in the presence of the Rapgef2 inhibitor SQ22,536 (50  $\mu$ M). Individual experimental replicates are represented. Statistical comparisons were made using Welch's t-test (A) or two-tailed unpaired t-test (B).

230

231

232 indicate that it is hyperexcitability induced by forskolin that induces a Phase I wave of  
233 gene expression via activation of DLK and JNK.

234

235 Forskolin Triggers a Phase-I Wave of Viral Gene Expression that is Independent of  
236 Histone Demethylase Activity.

237         Hyperexcitability results in the propensity of neurons to fire repeated action  
238 potentials, and is associated with specific changes in histone posttranslational  
239 modifications. The first is physiological DNA damage<sup>29,30</sup>, measured by the intensity of  
240  $\gamma$ H2AX staining in neuronal nuclei. Forskolin treatment was associated with an increase  
241 in the levels of  $\gamma$ H2AX at 5h post-treatment, which resolved by 15h post-treatment  
242 (Figure S2A and C), and is therefore indicative of physiological DNA damage and  
243 repair, which occurs upon neuronal hyperexcitability. A second reason for probing the  
244 DNA damage/repair pathway in response to forskolin treatment is that previously  
245 reactivation of HSV from latency has been associated with perturbation of the DNA  
246 damage/repair response<sup>12</sup>. Both inhibition of repair and exogenous DNA damage  
247 resulted in loss of AKT phosphorylation by PHLPP1, which was required for HSV  
248 reactivation. Although we did observe increased levels of  $\gamma$ H2AX following forskolin  
249 treatment, this was not accompanied by a loss of pAKT measured at 15h post-treatment  
250 (Figure S2D). This indicates that HSV reactivation in response to forskolin treatment  
251 does not involve dephosphorylation of AKT. Therefore, hyperexcitability triggers  
252 reactivation via an alternative mechanism that does not feed into the AKT.

253

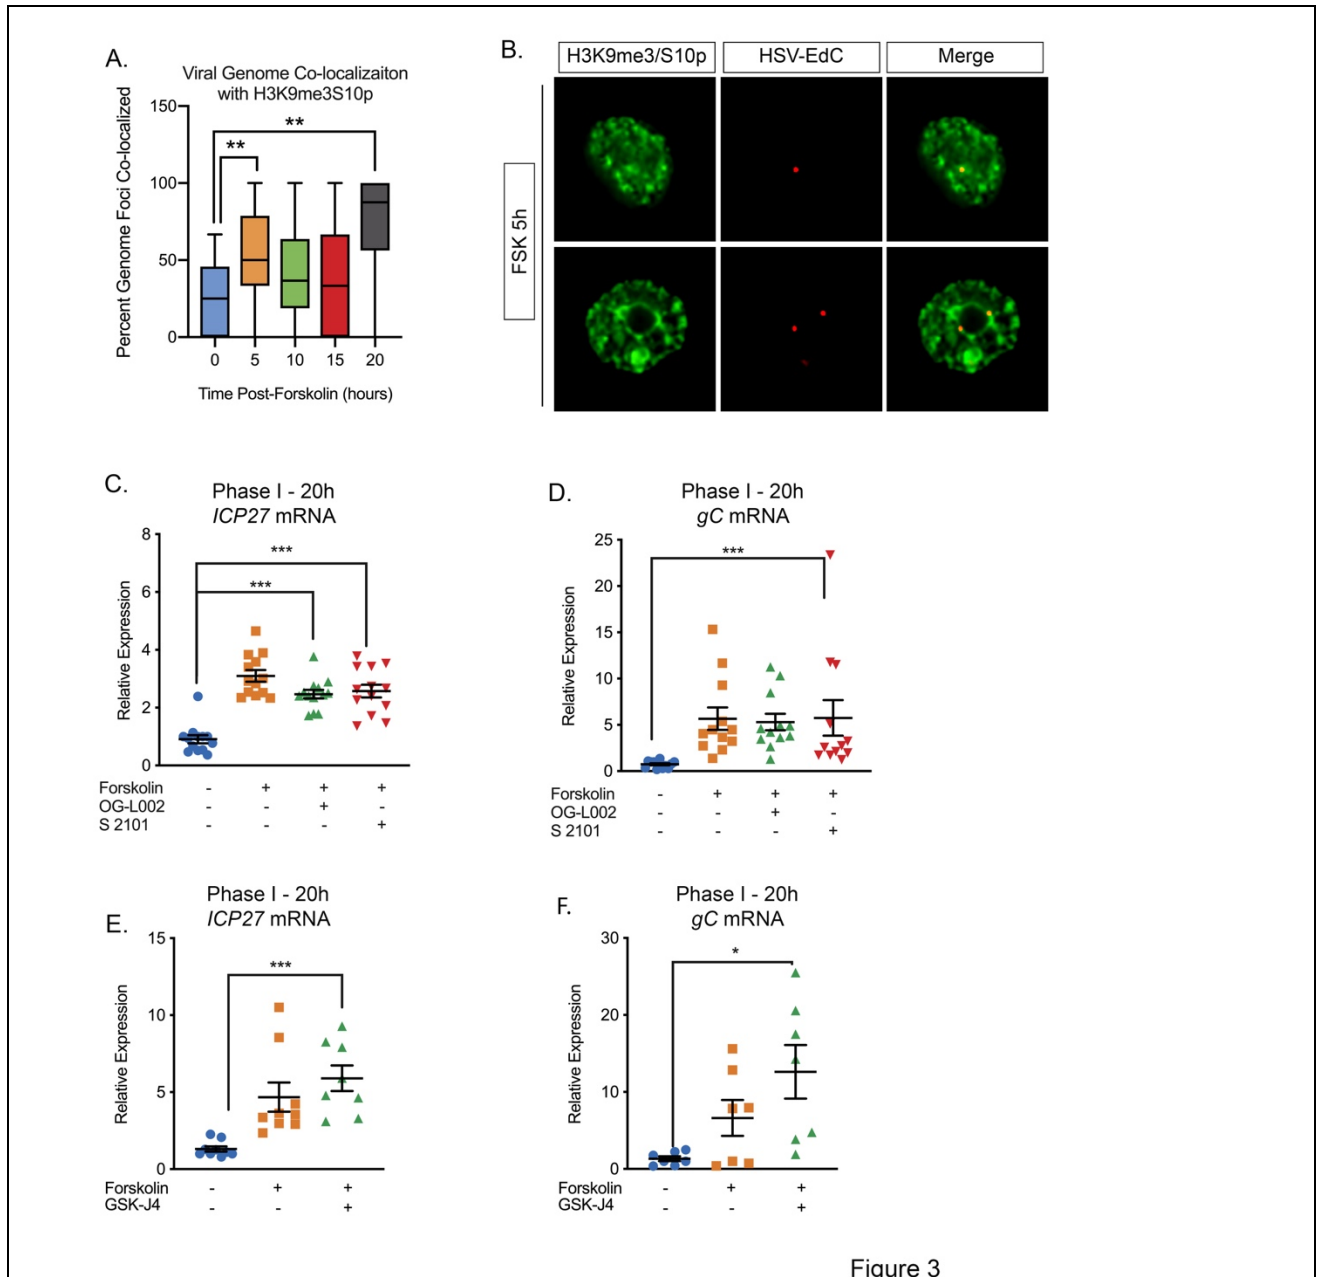

Figure 3

**Figure 3. The Initial Wave of Viral Lytic Gene Expression During Forskolin-mediated Reactivation is Independent on Histone Demethylase Activity.** (A) Quantification of the percentage of genome foci stained using click-chemistry that co-localize with H3K9me3/S10p. At least 15 fields of view were blindly scored from two independent experiments. Whiskers represent the 2.5-97.5 percentile range. (B) Representative images of click-chemistry based staining of HSV-EuC genomes and H3K9me3/S10p staining at 5h post-forskolin treatment. (C and D). Effect of the LSD1 inhibitors OG-L002 and S 2101 on forskolin-mediated Phase I of reactivation determined by RT-qPCR for ICP27 (C) and gC (D) viral lytic transcripts at 20h post-forskolin treatment and in the presence of 15 $\mu$ M OG-L002 and 20 $\mu$ M S 2102. (E) Effect of the JMJD3 and UTX inhibitor GSK-J4 (2 $\mu$ M) on forskolin-mediated Phase I measured by RT-qPCR for viral lytic transcripts ICP27 (E) and gC (F) at 20h post-forskolin treatment and in the presence of GSK-J4. For C-F each experimental replicate is represented. Statistical comparisons were made using two-tailed unpaired t-test (A) or Welch's t-test (C-F).



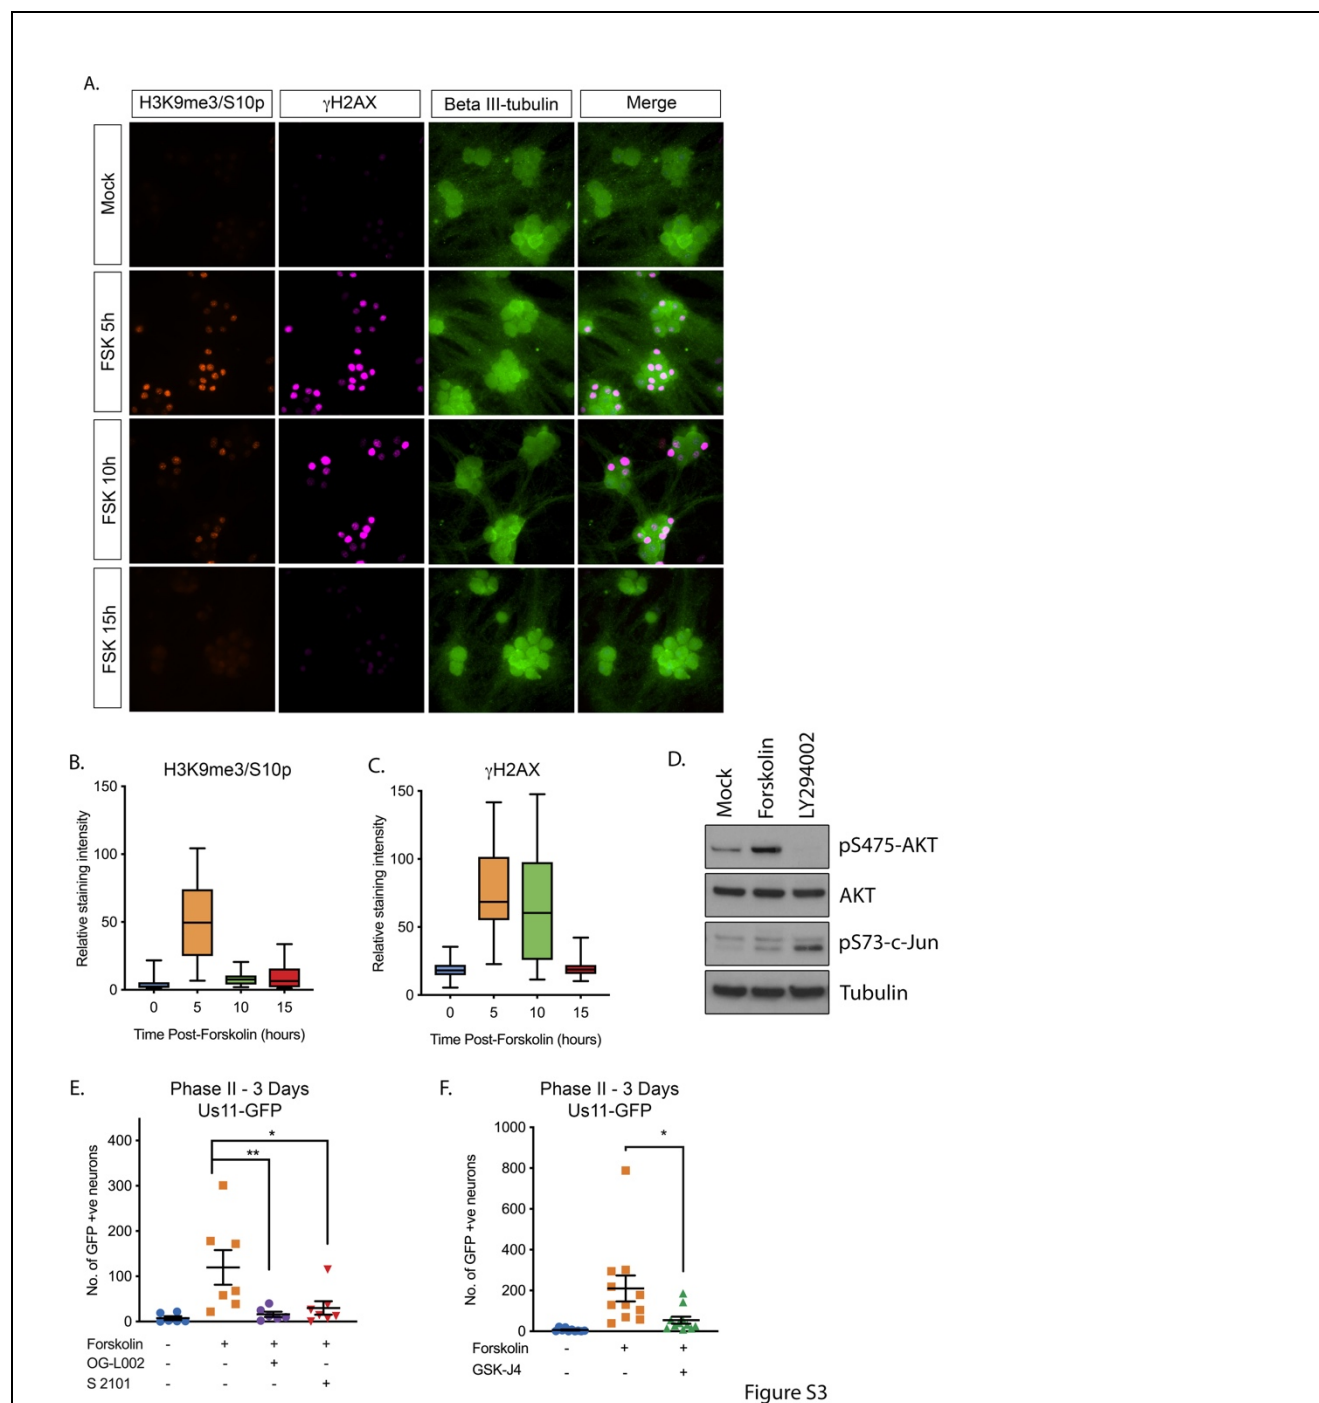

Figure S3

**Figure S3. Forskolin Treatment Induces Hyperexcitability-associated Histone Post-translational Modification in Sympathetic Neurons.** SCG neurons were treated with forskolin and immunofluorescence staining was carried out for H3K9me3/S10p, the DNA damage marker  $\gamma$ H2AX and the neuronal marker beta III-tubulin. (B) Quantification of neuronal nuclear staining intensity for H3K9me3 (>150 cells/condition). (C) Quantification of neuronal nuclear staining for  $\gamma$ H2AX. In B and C, whiskers represent the 2.5-97.5 percentile range. (D). Western blotting for pS475-AKT, total AKT, pS73-c-Jun and tubulin at 15h post-treatment with the PI3-kinase inhibitor LY294002 (20 $\mu$ M) or forskolin (60  $\mu$ M). (E) Effect of the LSD1 inhibitors OG-L002 (15 $\mu$ M) and S 2101 (20 $\mu$ M) on forskolin-mediated reactivation measured by Us11-GFP positive neurons. (F) Effect of the JMJD3

and UTX inhibitor GSK-J4 (2 $\mu$ M) on forskolin-mediated reactivation measured by Us11-GFP positive neurons. Statistical comparisons were made using Welch's t-test (E, F).

254

255           Previously, we found that Phase I reactivation is accompanied with a JNK-  
256 dependent histone methyl/phospho (marked by H3K9me3/pS10) switch on lytic  
257 promoters<sup>15</sup>. In cortical neurons, one study has found that hyperexcitability results in  
258 increased H3K9me3/pS10<sup>24</sup>. Therefore, we were particularly interested to determine  
259 whether forskolin treatment of sympathetic neurons triggered a histone S10  
260 phosphorylation on H3K9me3. Forskolin triggered a transient increase in  
261 H3K9me3/S10p at 5h post-treatment that had returned to baseline by 10h (Figure S3A  
262 and B). This indicates that, in keeping with cortical neurons, forskolin induces a histone  
263 H3K9me3/pS10 methyl/phospho switch on regions on cellular chromatin.

264

265           We next sought to determine whether the phospho/methyl switch that arises as a  
266 result of hyperexcitability plays a role in Phase I of HSV reactivation. We therefore  
267 investigated whether viral genomes were co-localized with H3K9me3/S10p following  
268 forskolin treatment. To visualize HSV genomes, viral stocks were grown in the presence  
269 of EdC as described previously<sup>53,54</sup>. Click-chemistry was performed on latently infected  
270 and neurons following forskolin treatment. As shown in Figure 3A and B, viral genomes  
271 co-localized with H3K9me3/pS10 following robust H3K9me3/S10p staining at 5h. The  
272 percentage of viral genomes that co-localized with H3K9me3/S10p was significantly  
273 increased compared to the unreactivated samples at 5h and 20h post-forskolin  
274 treatment (Figure 3A).

275

276 Serine phosphorylation adjacent to a repressive lysine modification is thought to  
277 permit transcription without the removal of the methyl group<sup>17,24</sup>. Therefore, we  
278 investigated whether histone demethylase activity was required for the initial induction in  
279 lytic gene expression following forskolin treatment. Previously, the H3K9me2 histone  
280 demethylase LSD1 has been found to be required for full HSV reactivation<sup>20,23</sup>, and in  
281 our in vitro model this was determined by the production of infectious viral particles or  
282 late gene synthesis at 48-72h post-reactivation<sup>15</sup>. Addition of two independent LSD1  
283 inhibitors (OG-L002 and S 2102) inhibited Us11-GFP synthesis at 72h post-reactivation  
284 (Figure 3C). Hence, LSD1 activity, and presumably removal of H3K9-methylation is  
285 required for forskolin-mediated reactivation. However, LSD1 inhibition did not prevent  
286 the initial induction of *ICP27* and *gC* mRNA expression at 20h post-forskolin treatment  
287 (Figure 3D and E). Therefore, this initial wave of viral lytic gene expression following  
288 forskolin-mediated reactivation is independent of histone H3K9 demethylase activity.

289

290 We previously found that H3K27me demethylase activity is required for full  
291 reactivation but not the initial wave of gene expression<sup>15</sup>. However, because of the lack  
292 of an antibody that specifically recognizes H3K27me3S28p and not also  
293 H3K9me3S10p, we are unable at this point to investigate genome co-localization with  
294 this combination of modifications. However, we could investigate the role of the  
295 H3K27me demethylases in forskolin-mediated reactivation. Treatment of neurons with  
296 the UTX/JMJD3 inhibitor GSK-J4<sup>55</sup> prevented the synthesis of Us11-GFP at 72h post-  
297 reactivation, indicating that removal of K27 methylation is required full reactivation  
298 (Figure 3F). However, the initial burst of gene expression (assessed by *ICP27* and *gC*

299 mRNA levels) was robustly induced at 20h post-forskolin treatment in the presence of  
300 GSK-J4 (Figure 3G and H). Taken together, our data indicate that the initial phase of  
301 gene expression following forskolin treatment is independent of histone demethylase  
302 activity and therefore consistent with a role for a histone methyl/phospho switch in  
303 permitting lytic gene expression.

304

### 305 Forskolin-Mediated Reactivation Requires Neuronal Excitability

306         Given that the HSV genome co-localized with regions of hyperexcitability-induced  
307 changes in histone phosphorylation, we investigated whether reactivation was linked to  
308 neuronal excitability. To inhibit action potential firing, we treated neurons with  
309 tetrodotoxin (TTX), which inhibits the majority of the voltage gated sodium channels and  
310 therefore depolarization. Addition of TTX significantly inhibited HSV reactivation  
311 triggered by forskolin, as measured by Us11-GFP positive neurons at 72 hours post-  
312 stimulus (Figure 4A). To further confirm a role for repeated action potential firing in  
313 forskolin-mediated reactivation, we investigated the role of voltage gated potassium  
314 channels, which are required for membrane repolarization. Addition of TEA, which  
315 inhibits voltage-gated potassium channel activity, also blocked HSV reactivation  
316 measure by Us11-GFP positive neurons at 3 days post-forskolin treatment (Figure S4B).  
317 Taken together, these data indicate that action potential firing is required for forskolin-  
318 mediated reactivation.

319

320         Increased levels of cAMP can act on nucleotide gated ion channels, including the  
321 hyperpolarization activated cyclic nucleotide gated (HCN) channels. HCN channels are

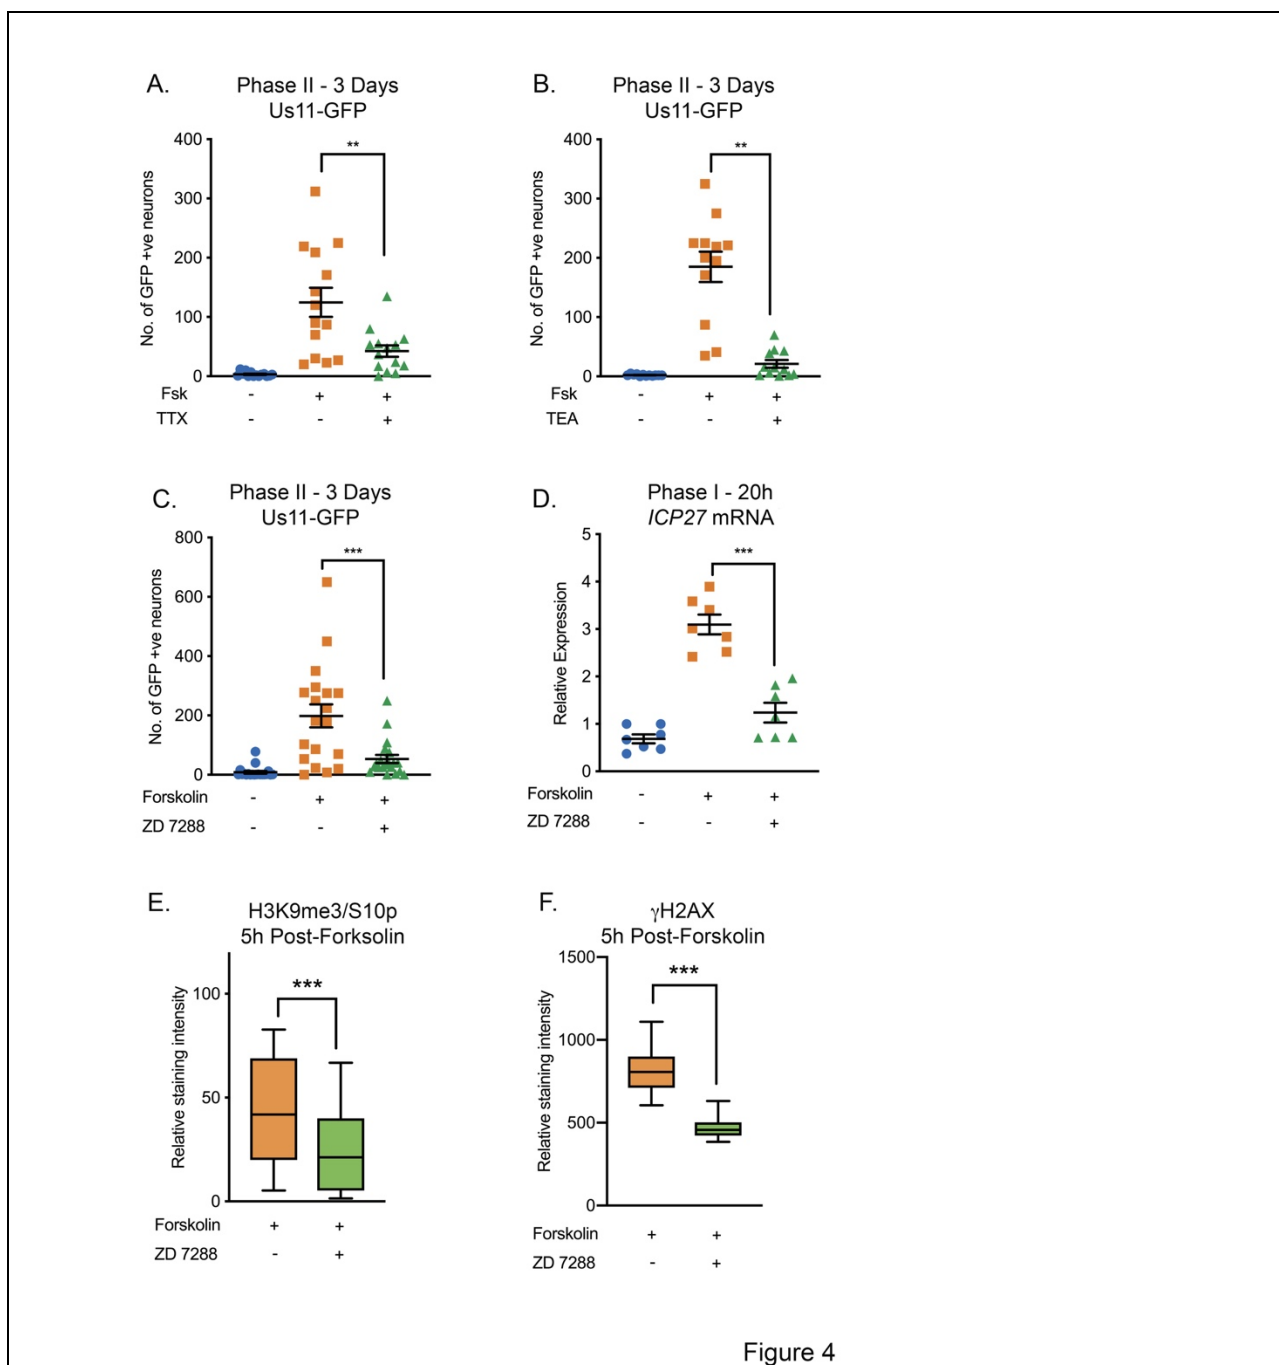

Figure 4

**Figure 4. HSV Reactivation Mediated by Forskolin Requires Neuronal Activity.**

(A) Latently infected cultures were reactivated with forskolin in the presence of the voltage-gated sodium channel blocker tetrodotoxin (TTX; 1 $\mu$ M) and the number of Us11-GFP positive neurons quantified at 3 days post-reactivation. (B) Latently infected cultures were reactivated with forskolin in the presence of the voltage-gated potassium channel blocker Tetraethylammonium (TEA; 10 mM) and the number of Us11-GFP positive neurons quantified at 3 days post-reactivation. (C) Forskolin-mediated reactivation in the presence of the HCN channel blockers ZD 7288 (10 $\mu$ M) quantified as the numbers of Us11-GFP positive neurons at 3 days post-reactivation. (D) The effect of ZD 7288 on the HSV lytic gene transcript ICP27 during Phase I reactivation measured at 20h post-forskolin treatment by RT-qPCR. Individual experimental

replicates are represented. (E and F) Quantification of the relative nuclear staining for H3K9me3/S10p and  $\gamma$ H2AX in SCG neurons at 5h post-forskolin treatment and in the presence of ZD 7288 from two independent experiments. Statistical comparisons were made using Welch's t-test (A-C), two-tailed unpaired t-test (D-F).

322  $K^+$  and  $Na^+$  channels that are activated by membrane hyperpolarization<sup>56,57</sup>. In the  
323 presence of high levels of cAMP, the gating potential of HCN channels is shifted in the  
324 positive direction, such that HCN channels can open at resting membrane potential,  
325 resulting in an increased propensity of neurons to undergo repeated firing<sup>57-59</sup>. HCN  
326 channel activity can be blocked by ZD 7288, Ivabradine or cesium chloride. Addition of  
327 ZD 7288 (Figure 4A), Ivabradine (Figure S4A) or CsCl (Figure S4B) all significantly  
328 reduced HSV reactivation triggered by forskolin, as measured by Us-11 GFP positive  
329 neurons at 3 days post-stimulus. To determine whether HCN channel activity was  
330 required for the initial induction of HSV lytic mRNA expression, we assessed viral  
331 mRNA expression during Phase I in the presence and absence of ZD 7288. Expression  
332 of representative lytic mRNAs *ICP27* (Figure 4D), *UL30* and *gC* (Figure S4C and D)  
333 were significantly decreased in the presence of ZD 7288 compared to the forskolin  
334 treated neurons alone, and were not significantly increased compared to the mock  
335 treated samples. Therefore, HCN channel activity is required for the initial induction of  
336 lytic gene expression during Phase I reactivation mediated by forskolin.

337  
338 We also confirmed that inhibition of HCN-channel activity affected the levels of  
339 hyperexcitability-associated changes in histone post-translational modifications.  
340 Addition of ZD 7288 resulted in significantly decreased staining intensities of both  
341 H3K9me3/S10p and  $\gamma$ H2AX at 5h post-forskolin treatment (Figure 4F and G), which was  
342 the peak time-point for which we observed these changes upon forskolin treatment  
343 alone (Figure S3 A and B). Therefore, activity of the HCN channels in response to

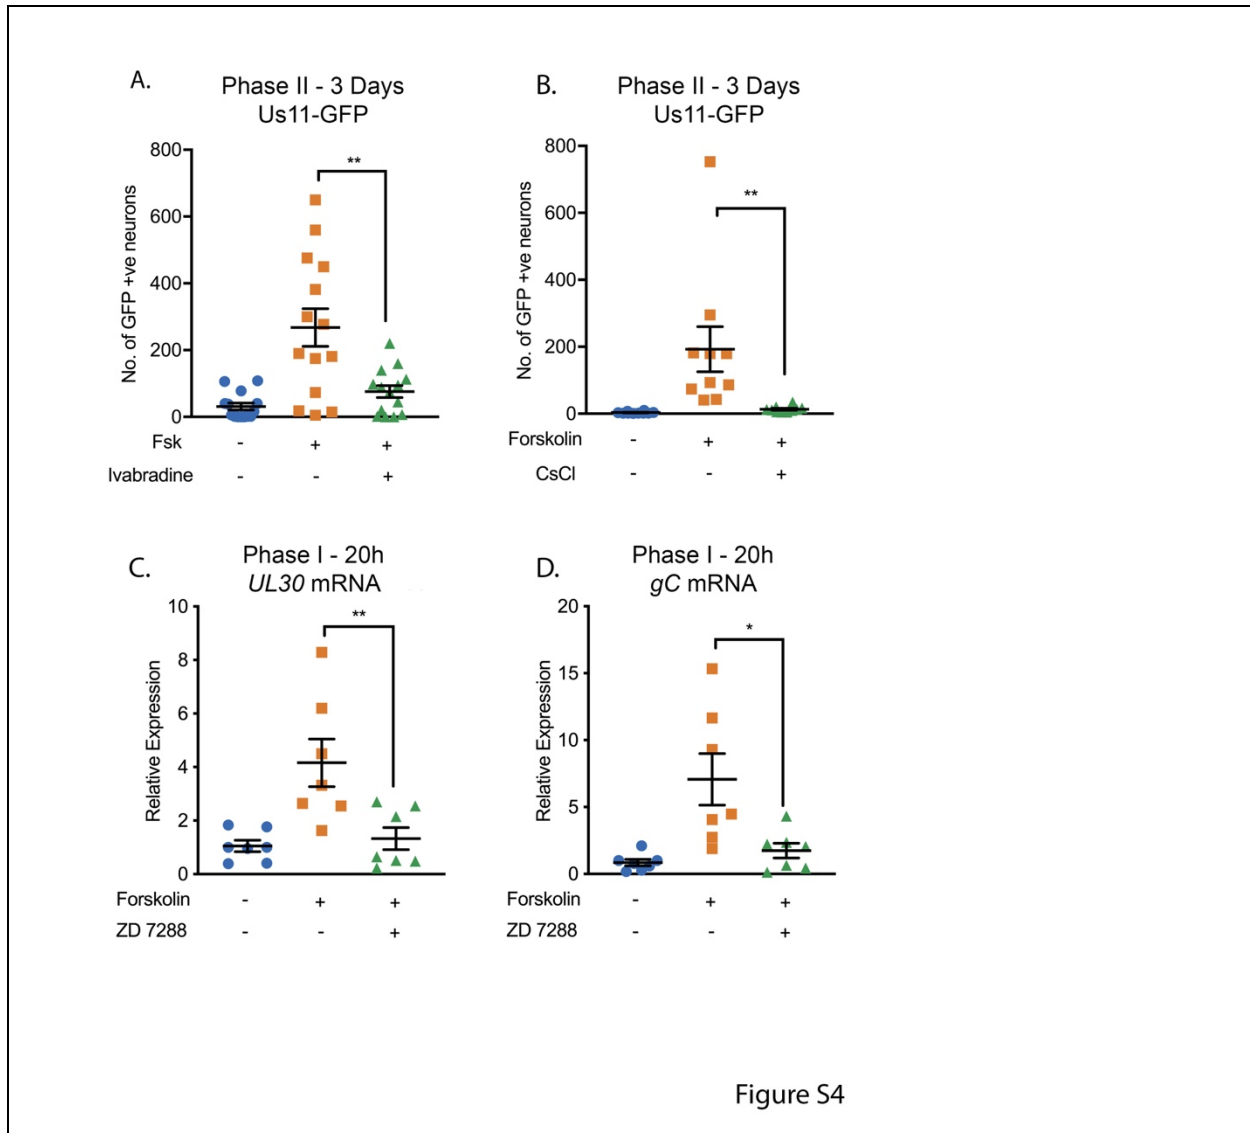

Figure S4

**Figure S4. HSV Reactivation Mediated by Forskolin Requires Neuronal Activity.** (A and B) Latently infected cultures were reactivated with forskolin in the presence of the HCN channel inhibitors ivabradine (20 $\mu$ M; A) and CsCl (3mM; B). Latently infected cultures were reactivated with forskolin in the presence of the HCN inhibitor ZD 7288 (10  $\mu$ M) and viral lytic transcripts measured at 20h post-reactivation. Individual experimental replicates are represented. Statistical comparisons were made using Welch's t-test (A, B) or two-tailed unpaired t-test (C, D).

344

345

346 increased levels of cAMP results in hyperexcitability-associated changes in  
347 histone modifications and reactivation of HSV from latent infection.

348

349 HSV Reactivation can be Induced by Stimuli that Directly Increase Neuronal Excitability

350 The role of ion-channel activity in forskolin-mediated reactivation prompted us to  
351 investigate whether additional stimuli that induce hyperexcitability in neurons also  
352 trigger HSV reactivation. We were also interested in whether reactivation required  
353 chronic versus short term hyperexcitability. Increasing the extracellular concentration of  
354 KCl is well-known to induce action potential firing. Therefore, we investigate the timing  
355 of both KCl and forskolin-mediated hyperexcitability in HSV reactivation. Both of these  
356 treatments triggered HSV reactivation more robustly if applied for 8h or more (Figure  
357 5A). This indicates that chronic neuronal hyperactivity is important in inducing  
358 reactivation of HSV.

359

360 To further clarify that hyperexcitability can directly trigger HSV reactivation, we  
361 investigated the effects of removal from a TTX block on latently infected neurons.  
362 Addition of TTX to neurons results in synaptic scaling, so that when the TTX is removed  
363 the neurons enter a hyperexcitable state<sup>60-63</sup>. TTX was added to the neurons for 2 days  
364 and then washed out. This resulted in a robust HSV reactivation as determined by  
365 Us11-GFP synthesis (Figure 5B). We also investigated whether the JNK-cell stress  
366 pathway was important in HSV reactivation in response to TTX-release. Addition of the  
367 JNK inhibitor SP600125 or the DLK inhibitor, GNE-3511, blocked HSV reactivation



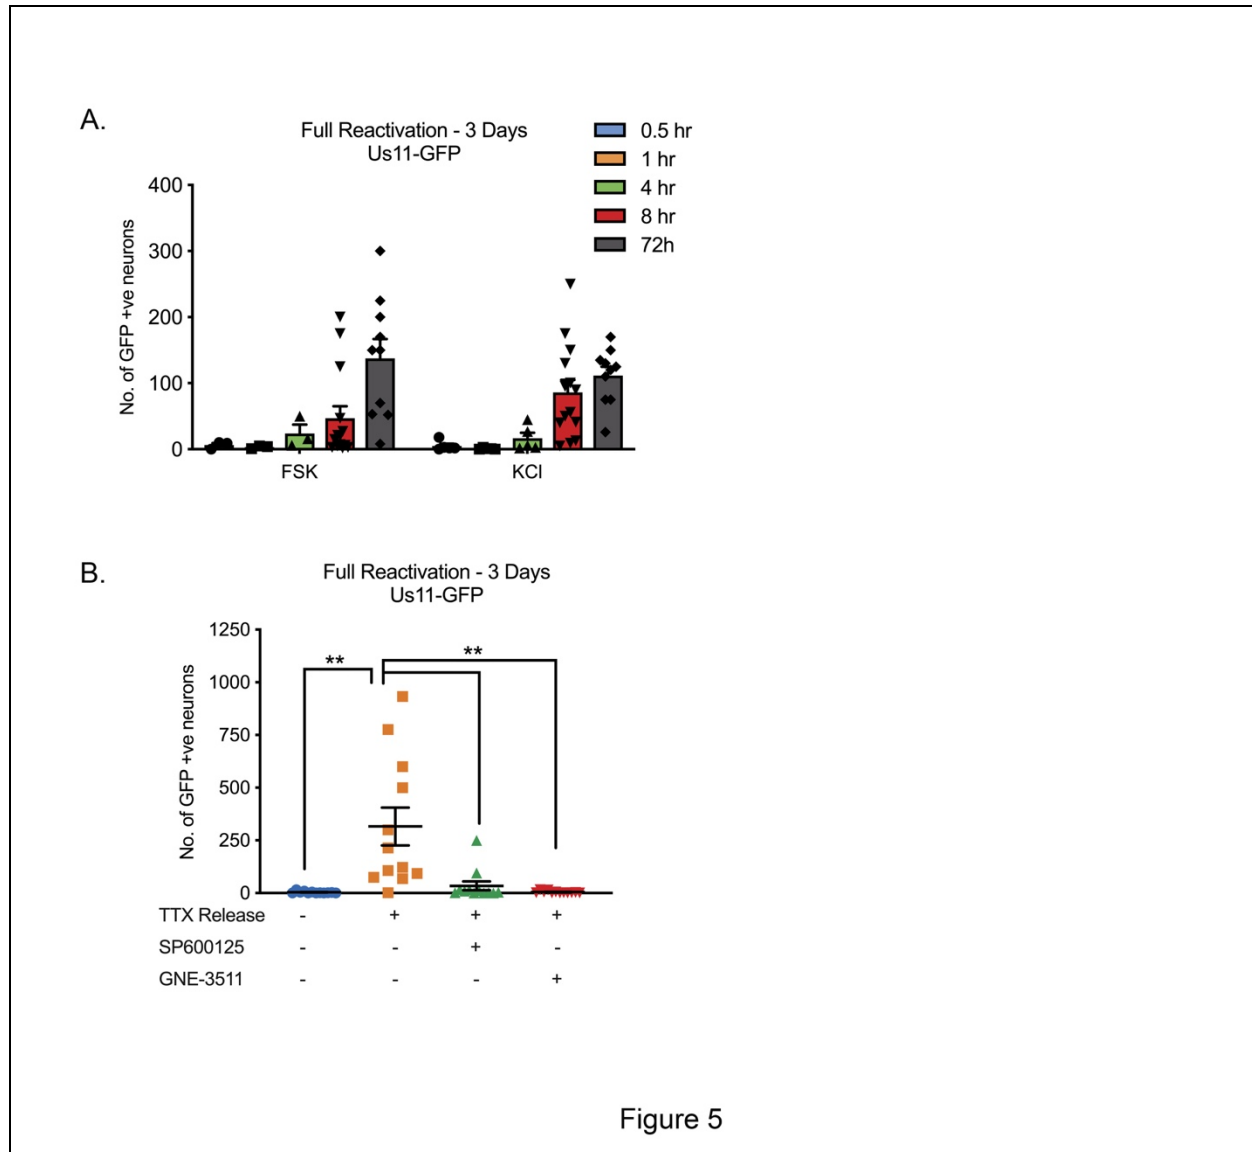

Figure 5

**Figure 5. HSV Reactivation Triggered by Prolonged Neuronal Hyperexcitability is DLK/JNK Dependent.** (A) Latently infected SCG cultures were treated with forskolin or KCl (55mM) for the indicated times followed by wash-out. Reactivation was quantified by number of Us11-GFP positive neurons at 3 days after the initial stimulus was added. (B) Latently infected neurons were placed in tetrodotoxin (TTX; 1 $\mu$ M) for 2 days and the TTX was then washed out. At the time of wash-out the JNK inhibitor SP600125 (20 $\mu$ M) or DLK inhibitor GNE-3511 (4 $\mu$ M) was added. Reactivation was quantified at 3-days post-wash-out. Individual experimental replicates are represented. Statistical comparisons were made using Welch's t-test.

370 following TTX-release. Therefore, directly inducing neuronal hyperexcitability triggers  
371 HSV reactivation in a DLK/JNK-dependent manner.

372

373 IL-1 $\beta$  Triggers HSV Reactivation in Mature Neurons in a DLK and HCN Channel

374 Dependent Manner

375 Our data thus far point to a reactivation of HSV following increasing episodes of  
376 neuronal hyperexcitability in a way that requires activation of the JNK-cell stress  
377 pathway. However, we wished to link this response to a physiological trigger that may  
378 stimulate HSV reactivation *in vivo*. Increased HCN-channel activity has been associated  
379 to inflammatory pain resulting from the activity of pyrogenic cytokines on neurons<sup>64</sup>. In  
380 addition, IL-1 $\beta$  is known to act on certain neurons to induce neuronal excitation<sup>39-41</sup>. IL-  
381 1 $\beta$  is released in the body during times of chronic, psychological stress. In addition, IL-  
382 1 $\beta$  contributes to the fever response<sup>31-34</sup>. In sympathetic neurons, we found that  
383 exposure of mature neurons to IL-1 $\beta$  induced an accumulation of the hyperexcitability-  
384 associated histone post-translational modifications  $\gamma$ H2AX and H3K9me3/S10p (Figure  
385 6A-C). We did not observe the same changes for post-natal neurons. The reasons for  
386 this maturation-dependent phenotype are unknown at this point but we hypothesize it  
387 could be due to changes in the expression of cellular factors required to respond to IL-  
388 1 $\beta$ . Therefore, these experiments were carried out on neurons that were more than 28  
389 days old. The kinetics of induction of these histone modifications was different from  
390 what we had previously observed for forskolin treatment, as both  $\gamma$ H2AX and  
391 H3K9me3/S10p steadily accumulated to 20h post-treatment. This likely reflects the  
392 activation of upstream signaling pathways in response to IL-1 $\beta$  prior to inducing

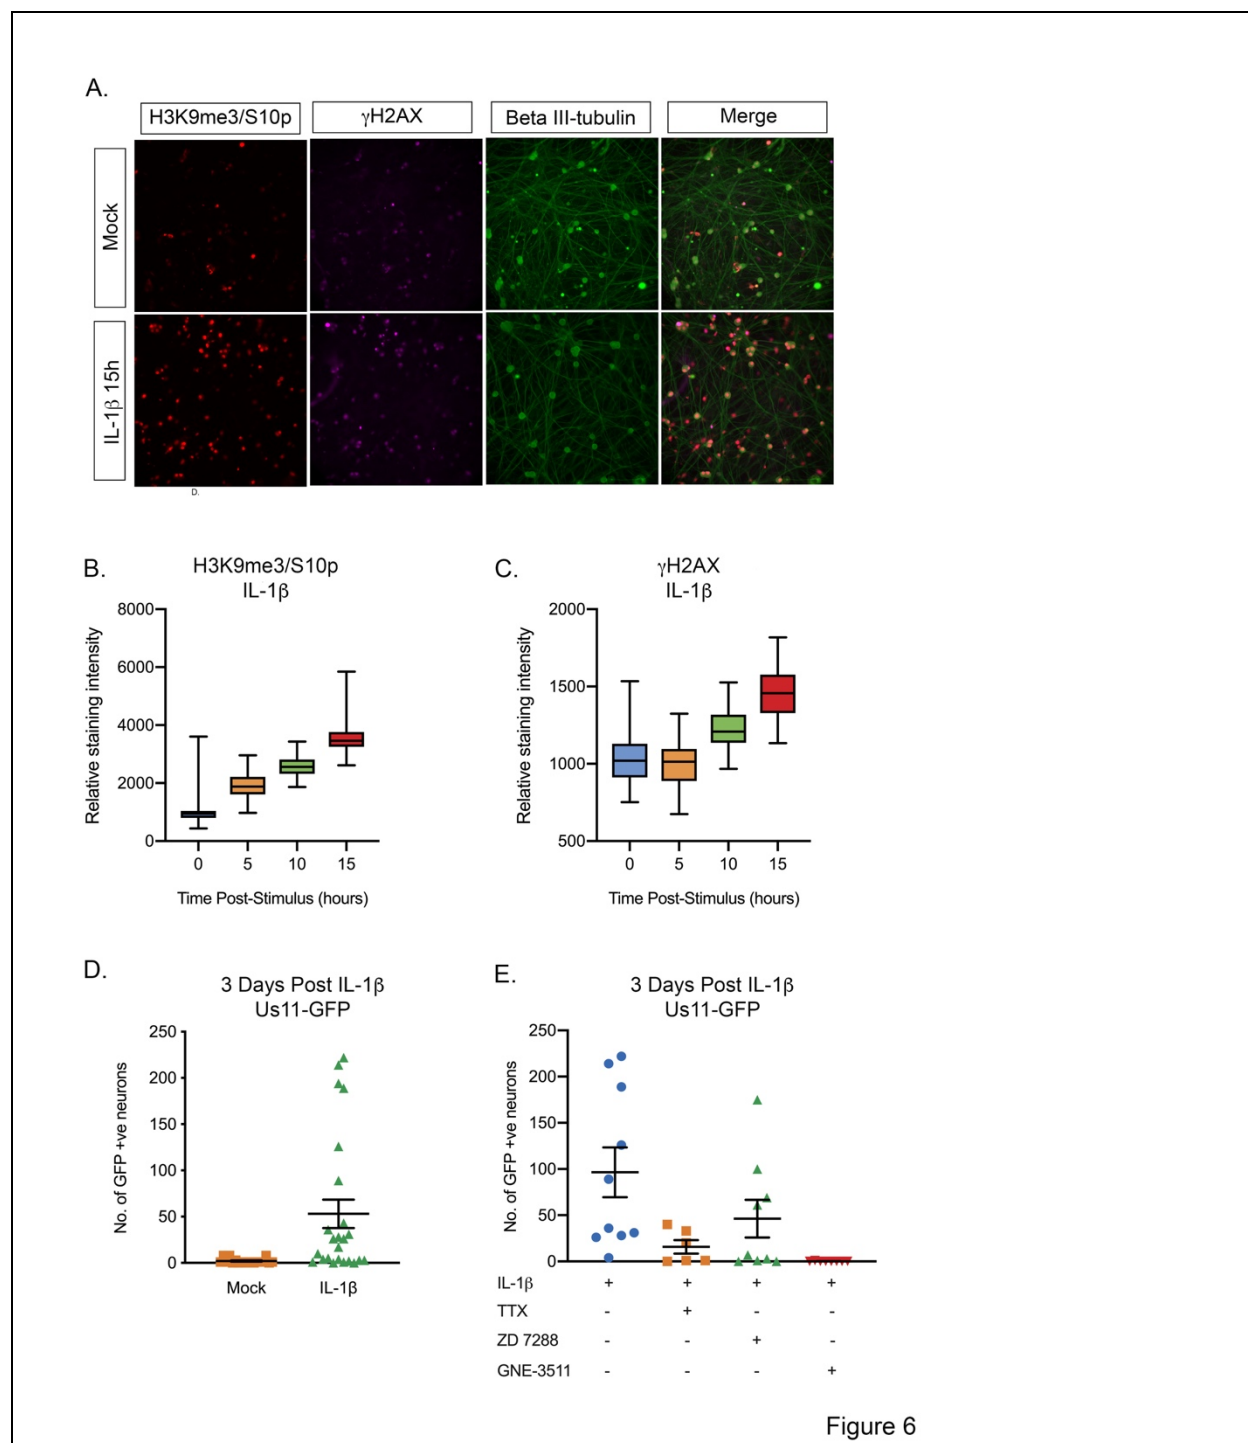

Figure 6

**Figure 6. IL-1 $\beta$ -Induced HSV Reactivation is Linked to Heightened Neuronal Activity and DLK Activation.** (A) Adult P28 SCG neurons were treated with IL-1 $\beta$  (30ng/mL) for 15 hrs and stained for H3K9me3/S10p,  $\gamma$ H2AX and beta II-tubulin to mark neurons. (B-C) Quantification of the intensity of H3K9me3/S10p and  $\gamma$ H2AX in neuronal nuclei following forskolin treatment from two independent experiments. (D). Addition of IL-1 $\beta$  to latently infected cultures of mature SCG neurons triggers HSV reactivation. (E). Quantification of IL-1 $\beta$  induced reactivation in the presence of the voltage gated sodium channel blocker TTX (1 $\mu$ M), the

HCN channel blocker ZD 7288 (10 $\mu$ M) and the DLK inhibitor GNE-3511 (4 $\mu$ M). In D and E individual experimental replicates are represented. Statistical comparisons were made using or two-tailed unpaired t-test (B, C) or Welch's t-test (D, E)

393

394 neuronal excitation as IL-1 $\beta$  increases the expression of voltage-gated sodium  
395 channels<sup>41</sup>. Importantly, IL-1 $\beta$  was able to trigger HSV reactivation in mature neurons  
396 (Figure 5D). Reactivation was reduced in the presence of the HCN-channel inhibitor ZD  
397 7288 and the voltage-gated sodium channel inhibitor TTX (Figure 6F), indicating that IL-  
398 1 $\beta$  triggered reactivation via increasing neuronal activity. Importantly, addition of the  
399 DLK inhibitor GNE-3511 blocked reactivation in response to IL-1 $\beta$  (Figure 6F).  
400 Therefore, IL-1 $\beta$  can induce HSV reactivation that is both dependent on neuronal  
401 activity and induction of the JNK neuronal cell stress response.

402

## 403 Discussion

404 As herpesviruses hide in the form of a latent infections of specific cell types, they  
405 sense changes to the infected cell that trigger the re-expression of viral lytic genes to  
406 promote reactivation. HSV establishes latency in neurons and has previously been  
407 found to sense changes in the neuronal stress signaling pathway to induce reactivation  
408 from latency. As an excitable cell type, the function of neurons is to rapidly transmit  
409 stimuli via the firing of action potentials, and under conditions of hyperexcitability,  
410 neurons increase their propensity to fire repeated action potentials. Here we show that  
411 this state of hyperexcitability induces HSV to undergo reactivation in a DLK/JNK  
412 dependent manner, indicating that the virus responds to both activation of cell stress  
413 signaling and prolonged hyperexcitability via a common pathway to result in  
414 reactivation. This common pathway also permits viral lytic gene expression from

415 silenced promoters without the requirement of histone demethylase activity via a histone  
416 phospho/methyl switch. Conditions that result in hyperexcitability include prolonged  
417 periods of stress and inflammation, which are both linked to the release of IL-1 $\beta$ <sup>31-34</sup>.  
418 Consistent with this, here we show that IL-1 $\beta$  induces DNA damage, and histone H3  
419 phosphorylation in sympathetic neurons, which are both markers of neuronal  
420 excitability. Importantly, IL-1 $\beta$  triggered HSV reactivation that was dependent on  
421 neuronal activity and activation of DLK. Therefore, this study identifies a physiological  
422 stimulus that induces HSV reactivation via increasing neuronal excitability and places  
423 DLK/JNK signaling and a histone phospho/methyl switch as central to HSV reactivation.

424

425         Neuronal hyperexcitability results in DNA damage followed by repair, which  
426 together are thought to mediate the expression of cellular immediate early genes<sup>29,30</sup>.  
427 Here we show that forskolin treatment and IL-1 $\beta$  also induce DNA damage in  
428 sympathetic neurons. Previously, HSV reactivation has been found to occur following  
429 inhibition of DNA damage, inhibition of repair and exogenous DNA damage<sup>12</sup>. In the  
430 context of repair inhibition or exogenous DNA damage, reactivation was dependent on  
431 dephosphorylation of AKT by the PHLPP1 phosphatase and activation of JNK, and  
432 therefore feeds into the same pathway as PI3K-inhibition. However, we did not observe  
433 decreased AKT phosphorylation in response to forskolin treatment, indicating that the  
434 mechanism of reactivation is distinct following physiological levels of DNA damage  
435 resulting from neuronal hyperexcitability versus perturbation of the damage/repair  
436 pathways.

437

438           Conditions that result in hyperexcitability include prolonged periods of stress and  
439 inflammation, which are both linked to the release of IL-1 $\beta$ <sup>31-34</sup>. Consistent with these  
440 findings, we show that IL-1 $\beta$  treatment induces two markers of neuronal excitability,  
441 DNA damage and histone H3 phosphorylation, in primary sympathetic neurons. The IL-  
442 1 family of cytokines act via the IL-1 receptor to activate downstream signaling  
443 pathways<sup>65</sup>. IL-1 $\beta$  is released systemically during prolonged periods of psychological  
444 stress and upon infection via activation of the inflammasome<sup>31-34</sup>. IL-1 $\alpha$ , which also  
445 signals via the IL-1R, is released locally as an alarmin. Interesting IL-1 $\alpha$  and IL-1 $\beta$  are  
446 found at high levels in keratinocytes and are released upon HSV-1 infection<sup>42</sup>, where  
447 they can mediate antiviral responses in underlying stromal fibroblasts and endothelial  
448 cells. Antiviral responses mediated by IL-1 signaling have been found to involve NF- $\kappa$ B,  
449 IRF3 and/or IRF1<sup>43</sup>. The downstream signaling elicited by IL-1 in neurons has not been  
450 clearly defined and likely varies between different subtypes of neurons. NF- $\kappa$ B has been  
451 reported to be absent in certain subtypes of neurons but constitutively active in  
452 others<sup>66,67</sup>, and a recent study suggests that NF- $\kappa$ B levels increase with neuronal  
453 maturation<sup>68</sup>, which may be why we only observed IL-1-mediated reactivation in mature  
454 neurons. Additional studies have found a role for p38MAPK signaling and AKT/mTOR  
455 signaling in neuronal IL-1-mediated responses<sup>69,70</sup>. A common feature of IL-1 signaling  
456 in neurons is increased excitability, which has been associated with neurotransmitter  
457 release, and mediates a variety of physiological responses including behavior  
458 modulation and an intersection with the hosts' immune response<sup>39-41</sup>. IL-1 is also  
459 associated with pathological conditions, including neurodegenerative disease such as  
460 Alzheimer's disease<sup>71</sup>. There are multiple studies linking HSV-1 infection to the

461 progression of Alzheimer's<sup>2</sup>; therefore, the combination of both HSV infection and  
462 increased IL-1 could have a feed forward effect on the progression of Alzheimer's  
463 disease by promoting increased reactivation of HSV from latency.

464

465 Experiments using primary neuronal *in vitro* model systems and inducing  
466 reactivation by PI3-kinase inhibition have shown that reactivation progresses over two  
467 phases. Phase 1 involves the synchronous up-regulation of lytic gene expression that  
468 occurs independently of the viral transactivator VP16 and the activity of cellular histone  
469 demethylases<sup>15,18</sup>. A population of neurons progress to full reactivation (Phase II), which  
470 is dependent on both VP16 and HDM activity<sup>15,18</sup>. We previously found that lytic gene  
471 expression in Phase I is DLK/JNK dependent and is correlated with a JNK-dependent  
472 histone methyl/phospho switch on lytic gene promoters<sup>15</sup>. Here we demonstrate that a  
473 Phase 1 wave of viral gene expression that is dependent on activation of JNK but not  
474 histone demethylases also occurs in response to neuronal hyperexcitability. The co-  
475 localization of viral genomes with H3K9me3/pS10 indicates that a histone  
476 methyl/phospho switch also permits lytic gene expression to occur following forskolin  
477 treatment in a manner that is independent of HDM activity. This indicates that  
478 reactivation proceeds via a Phase 1-wave of gene expression in response to multiple  
479 different stimuli. However we note that there may be differences in the mechanism and  
480 kinetics of reactivation with different stimuli and/or strains of HSV-1 as reactivation  
481 triggered by axotomy may bypass Phase I<sup>19,20</sup> and reactivation induced *in vivo* by heat  
482 shock with a more pathogenic strain of HSV triggered more rapid reactivation<sup>72</sup>. It will  
483 be especially interesting to determine in the future whether there are differences in the

484 progression to reactivation with different strains of HSV. Ultimately, these reactivation  
485 kinetics may relate differences in the epigenetic structures of viral genomes that vary  
486 based on virus strains or differential manipulation of host-cell signaling pathways.

487

488         The Wilcox lab demonstrated in 1992 that reactivation can be induced by  
489 forskolin, and it has since been used as a trigger in multiple studies<sup>25-28</sup>. However, the  
490 mechanism by which increasing levels of cAMP induces lytic gene expression was not  
491 known. Here we link cAMP-induced reactivation to the excitation state of the neuron and  
492 show that the initial induction of viral gene expression is dependent on DLK and JNK  
493 activity but independent of CREB and PKA. The activity of PKA may be required for full  
494 reactivation, which is also consistent with a role for PKA in overcoming repression of the  
495 related Pseudorabies Virus during *de novo* axonal infection<sup>73</sup>. Our data also suggest  
496 that CREB may be involved in the progression to full reactivation. However, the  
497 mechanism of action of the inhibitor used here, 666-15, is not entirely clear. It has been  
498 reported as preventing CREB-mediated gene expression, but may act to prevent  
499 recruitment of histone acetyltransferases<sup>74</sup>. Therefore, inhibition of Phase II reactivation  
500 by 666-15 would be consistent with more large-scale chromatin remodeling on the viral  
501 genome at this stage. In addition, previous work has identified a role for inducible cAMP  
502 early repressor (ICER) in HSV reactivation<sup>26</sup>. ICER is a repressor of gene expression  
503 via heterodimerization with members of the CREB/ATF family of transcription factors.  
504 CREB expression is also known to be down-regulated by loss of NGF-signaling<sup>75</sup>.  
505 Therefore, it is conceivable that inhibition, rather than activation, of CREB is important  
506 for reactivation of HSV from latency.



507

508           Previously, we found that JNK activation by DLK is required for reactivation  
509 following interruption of the NGF-signaling pathway. Here we find that forskolin and IL-  
510 1 $\beta$ -mediated reactivation also required both DLK activity, further reinforcing the central  
511 role of DLK and JNK in reactivation of HSV from latency. DLK is known as a master  
512 regulator of neuronal response to stress stimuli and mediates whole cell death, axon  
513 pruning, regeneration or generation depending on the nature of the stimuli. However, it  
514 has not before been linked to neuronal hyperexcitability or the response to IL-1 $\beta$   
515 signaling. The known mechanisms of DLK activation include loss of AKT activation and  
516 phosphorylation by PKA, neither of which could be linked to HSV reactivation mediated  
517 by forskolin in this study. Following activation by DLK, one mechanism by which JNK is  
518 thought to permit lytic gene expression is via recruitment to viral promoters and histone  
519 phosphorylation. However, it is likely that there are additional, JNK-dependent effects  
520 including activation of pioneer or transcription factors that also mediate viral gene  
521 expression. Further insight into how HSV has hijacked this cellular pathway to induce  
522 lytic gene expression may lead to novel therapeutics that prevent reactivation, in  
523 addition to providing information on how viral gene expression initiates from promoters  
524 assembled into heterochromatin.

525

## 526 Acknowledgements

527 We thank Ian Mohr (NYU) for supplying the Us11-GFP virus used in this study. This  
528 work was supported by NIH/NINDS R01NS105630 (to A.R.C), NIH/NIAID T32AI007046

529 (S.R.C. and J.B.S), NIH/NEI F30EY030397 (J.B.S), NIH/NIGMS T32GM008136 (S.D)  
530 and T32GM007267 (J.B.S) and MRC (<https://mrc.ukri.org>) MC\_UU\_12014/5 (C.B).

531

## 532 **Materials and Methods**

### 533 **Reagents**

534 Compounds used in the study are as follows: Acycloguanosine, FUDR, Uridine,  
535 SP600125, GNE-3511, GSK-J4, L-Glutamic Acid, and Ivabradine (Millipore Sigma);  
536 Forskolin, LY 294002, 666-15, SQ 22536, KT 5720, Tetraethylammonium chloride,  
537 Cesium chloride, OG-L002, S2101, Tetrodotoxin, and ESI-09 (Tocris); 1,9-dideoxy  
538 Forskolin, ZD 7288 and 8-bromo-cyclic AMP (Cayman Chemicals); Nerve Growth  
539 Factor 2.5S (Alomone Labs); Primocin (Invivogen); Aphidicolin (AG Scientific); IL-1 $\beta$   
540 (Shenandoah Biotechnology); WAY-150138 was kindly provided by Pfizer, Dr. Jay  
541 Brown and Dr. Dan Engel at the University of Virginia, and Dr. Lynn Enquist at  
542 Princeton University. Compound information and concentrations used can be found  
543 below in Table S1.

544

### 545 **Preparation of HSV-1 Virus Stocks**

546 HSV-1 stocks of eGFP-Us11 Patton were grown and titrated on Vero cells obtained  
547 from the American Type Culture Collection (Manassas, VA). Cells were maintained in  
548 Dulbecco's Modified Eagle's Medium (Gibco) supplemented with 10% FetalPlex  
549 (Gemini Bio-Products) and 2 mM L-Glutamine. eGFP-Us11 Patton (HSV-1 Patton strain  
550 with eGFP reporter protein fused to true late protein Us11<sup>44</sup>) was kindly provided by Dr.  
551 Ian Mohr at New York University.

552

### 553 **Primary Neuronal Cultures**

554 Sympathetic neurons from the Superior Cervical Ganglia (SCG) of post-natal day 0-2  
555 (P0-P2) or adult (P21-P24) CD1 Mice (Charles River Laboratories) were dissected as  
556 previously described<sup>15</sup>. Rodent handling and husbandry were carried out under animal  
557 protocols approved by the Animal Care and Use Committee of the University of Virginia  
558 (UVA). Ganglia were briefly kept in Leibovitz's L-15 media with 2.05 mM L-Glutamine  
559 before dissociation in Collagenase Type IV (1 mg/mL) followed by Trypsin (2.5 mg/mL)  
560 for 20 minutes each at 37 °C. Dissociated ganglia were triturated, and approximately  
561 10,000 neurons per well were plated onto rat tail collagen in a 24-well plate.

562 Sympathetic neurons were maintained in CM1 (Neurobasal® Medium supplemented  
563 with PRIME-XV IS21 Neuronal Supplement (Irvine Scientific), 50 ng/mL Mouse NGF  
564 2.5S, 2 mM L-Glutamine, and Primocin). Aphidicolin (3.3 µg/mL), Fluorodeoxyuridine  
565 (20 µM) and Uridine (20 µM) were added to the CM1 for the first five days post-  
566 dissection to select against proliferating cells.

567

### 568 **Establishment and Reactivation of Latent HSV-1 Infection in Primary Neurons**

569 Latent HSV-1 infection was established in P6-8 sympathetic neurons from SCGs.  
570 Neurons were cultured for at least 24 hours without antimetabolic agents prior to infection.  
571 The cultures were infected with eGFP-Us11 (Patton recombinant strain of HSV-1  
572 expressing an eGFP reporter fused to true late protein Us11). Neurons were infected at  
573 a Multiplicity of Infection (MOI) of 7.5 PFU/cell (assuming  $1.0 \times 10^4$  neurons/well/24-well  
574 plate) in DPBS +CaCl<sub>2</sub> +MgCl<sub>2</sub> supplemented with 1% Fetal Bovine Serum, 4.5 g/L

575 glucose, and 10  $\mu$ M Acyclovir (ACV) for three hours at 37 °C. Post-infection, inoculum  
576 was replaced with CM1 containing 50  $\mu$ M ACV for 5-6 days, followed by CM1 without  
577 ACV. Reactivation was carried out in DMEM/F12 (Gibco) supplemented with 10% Fetal  
578 Bovine Serum, Mouse NGF 2.5S (50 ng/mL) and Primocin. Inhibitors were added either  
579 one hour prior to or concurrently with the reactivation stimulus. WAY-150138 (2-10  
580  $\mu$ g/mL) was added to reactivation cocktail to limit cell-to-cell spread. Reactivation was  
581 quantified by counting number of GFP-positive neurons or performing Reverse  
582 Transcription Quantitative PCR (RT-qPCR) of HSV-1 lytic mRNAs isolated from the  
583 cells in culture.

584

585 **Analysis of mRNA expression by reverse-transcription quantitative PCR (RT-**  
586 **qPCR)**

587 To assess relative expression of HSV-1 lytic mRNA, total RNA was extracted from  
588 approximately  $1.0 \times 10^4$  neurons using the Quick-RNA™ Miniprep Kit (Zymo Research)  
589 with an on-column DNase I digestion. mRNA was converted to cDNA using the  
590 SuperScript IV First-Strand Synthesis system (Invitrogen) using equal amounts of RNA  
591 (20-30 ng/reaction). To assess viral DNA load, total DNA was extracted from  
592 approximately  $1.0 \times 10^4$  neurons using the Quick-DNA™ Miniprep Plus Kit (Zymo  
593 Research). qPCR was carried out using *Power SYBR™ Green PCR Master Mix*  
594 (Applied Biosystems). The relative mRNA or DNA copy number was determined using  
595 the Comparative  $C_T$  ( $\Delta\Delta C_T$ ) method normalized to mRNA or DNA levels in latently  
596 infected samples. Viral RNAs were normalized to mouse reference gene GAPDH. All

597 samples were run in duplicate on an Applied Biosystems™ QuantStudio™ 6 Flex Real-  
598 Time PCR System. Primers used are described in Table S2.

599

## 600 **Western Blot Analysis**

601 Neurons were lysed in RIPA Buffer with cOmplete, Mini, EDTA-Free Protease Inhibitor  
602 Cocktail (Roche) and PhosSTOP Phosphatase Inhibitor Cocktail (Roche) on ice for one  
603 hour with regular vortexing to aid lysis. Insoluble proteins were removed via  
604 centrifugation, and lysate protein concentration was determined using the Pierce  
605 Bicinchoninic Acid Protein Assay Kit (Invitrogen) using a standard curve created with  
606 BSA standards of known concentration. Equal quantities of protein (generally 20-50 µg)  
607 were resolved on 4-20% gradient SDS-Polyacrylamide gels (Bio-Rad) and then  
608 transferred onto Polyvinylidene difluoride membranes (Millipore Sigma). Membranes  
609 were blocked in PVDF Blocking Reagent for Can Get Signal (Toyobo) for one hour.  
610 Primary antibodies were diluted in Can Get Signal Immunoreaction Enhancer Solution 1  
611 (Toyobo) and membranes were incubated overnight at 4°C. Antibodies and  
612 concentrations are described in Table S3 below. HRP-labeled secondary antibodies  
613 were diluted in Can Get Signal Immunoreaction Enhancer Solution 2 (Toyobo) and  
614 membranes were incubated for one hour at room temperature. Blots were developed  
615 using Western Lightning Plus-ECL Enhanced Chemiluminescence Substrate  
616 (PerkinElmer) and ProSignal ECL Blotting Film (Prometheus Protein Biology Products)  
617 according to manufacturer's instructions. Blots were stripped for reblotting using  
618 NewBlot PVDF Stripping Buffer (Licor).

619

## 620 **Immunofluorescence**

621 Neurons were fixed for 15 minutes in 4% Formaldehyde and blocked in 5% Bovine  
622 Serum Albumin and 0.3% Triton X-100 and incubated overnight in primary antibody.  
623 Antibodies and concentrations are described in Table S4 below. Following primary  
624 antibody treatment, neurons were incubated for one hour in Alexa Fluor® 488-, 555-,  
625 and 647-conjugated secondary antibodies for multi-color imaging (Invitrogen). Nuclei  
626 were stained with Hoechst 33258 (Life Technologies). Images were acquired using an  
627 sCMOS charge-coupled device camera (pco.edge) mounted on a Nikon Eclipse Ti  
628 Inverted Epifluorescent microscope using NIS-Elements software (Nikon). Images were  
629 analyzed and intensity quantified using ImageJ.

630

## 631 **Click Chemistry**

632 Click chemistry was carried out as described previously<sup>53</sup> with some modifications.  
633 Neurons were washed with CSK buffer (10 mM HEPES, 100 mM NaCl, 300 mM  
634 Sucrose, 3 mM MgCl<sub>2</sub>, 5 mM EGTA) and simultaneously fixed and permeabilized for 10  
635 minutes in 1.8% methanol-free formaldehyde (0.5% Triton X-100, 1%  
636 phenylmethylsulfonyl fluoride (PMSF)) in CSK buffer, then washed twice with PBS  
637 before continuing to the click chemistry reaction and immunostaining. Samples were  
638 blocked with 3% BSA for 30 minutes, followed by click chemistry using EdC-labelled  
639 HSV-1 DNA and the Click-iT EdU Alexa Fluor 555 Imaging Kit (ThermoFisher Scientific,  
640 C10638) according to the manufacturer's instructions. For immunostaining, samples  
641 were incubated overnight with primary antibodies in 3% BSA. Following primary  
642 antibody treatment, neurons were incubated for one hour in Alexa Fluor® 488-, 555-,

643 and 647-conjugated secondary antibodies for multi-color imaging (Invitrogen). Nuclei  
644 were stained with Hoechst 33258 (Life Technologies). Images were acquired at 60x  
645 using an sCMOS charge-coupled device camera (pco.edge) mounted on a Nikon  
646 Eclipse Ti Inverted Epifluorescent microscope using NIS-Elements software (Nikon).  
647 Images were analyzed and intensity quantified using ImageJ.

648

### 649 **Statistical Analysis**

650 Power analysis was used to determine the appropriate sample sizes for statistical  
651 analysis. All statistical analysis was performed using Prism V8.4. Welch's t-test was  
652 used for GFP fluorescence experiments and two-tailed unpaired t-test was used for RT-  
653 qPCR and IF experiments; specific analyses are included in the figure legends. EdC  
654 virus and H3K9me3S10/p co-localization was quantified using ImageJ after sample  
655 blinding. Mean fluorescence intensity of  $\gamma$ H2AX was quantified using ImageJ.

656

657

## 658 References

- 659 1 Arvin, A. *et al.* Human Herpesviruses: Biology, Therapy, and Immunoprophylaxis.  
660 (2007).
- 661 2 Itzhaki, R. F. Corroboration of a Major Role for Herpes Simplex Virus Type 1 in  
662 Alzheimer's Disease. *Front Aging Neurosci* **10**, 324, doi:10.3389/fnagi.2018.00324 (2018).
- 663 3 Suzich, J. B. & Cliffe, A. R. Strength in diversity: Understanding the pathways to herpes  
664 simplex virus reactivation. *Virology* **522**, 81-91, doi:10.1016/j.virol.2018.07.011 (2018).
- 665 4 Deshmane, S. L. & Fraser, N. W. During latency, herpes simplex virus type 1 DNA is  
666 associated with nucleosomes in a chromatin structure. *Journal of Virology* **63**, 943-947 (1989).
- 667 5 Wang, Q.-Y. *et al.* Herpesviral latency-associated transcript gene promotes assembly of  
668 heterochromatin on viral lytic-gene promoters in latent infection. *Proceedings of the National*  
669 *Academy of Sciences* **102**, 16055-16059 (2005).
- 670 6 Knipe, D. M. & Cliffe, A. Chromatin control of herpes simplex virus lytic and latent  
671 infection. *Nat Rev Microbiol* **6**, 211-221, doi:10.1038/nrmicro1794 (2008).
- 672 7 Cliffe, A. R., Garber, D. A. & Knipe, D. M. Transcription of the herpes simplex virus  
673 latency-associated transcript promotes the formation of facultative heterochromatin on lytic  
674 promoters. *J Virol* **83**, 8182-8190, doi:10.1128/JVI.00712-09 (2009).
- 675 8 Kwiatkowski, D. L., Thompson, H. W. & Bloom, D. C. The polycomb group protein Bmi1  
676 binds to the herpes simplex virus 1 latent genome and maintains repressive histone marks  
677 during latency. *J Virol* **83**, 8173-8181, doi:10.1128/JVI.00686-09 (2009).
- 678 9 Wilcox, C. L. & Johnson, E. M. Characterization of nerve growth factor-dependent  
679 herpes simplex virus latency in neurons in vitro. *Journal of Virology* **62**, 393-399 (1988).
- 680 10 Wilcox, C. L., Smith, R. L., Freed, C. R. & Johnson, E. M. Nerve growth factor-dependence  
681 of herpes simplex virus latency in peripheral sympathetic and sensory neurons in vitro. *Journal*  
682 *of Neuroscience* **10**, 1268-1275 (1990).
- 683 11 Camarena, V. *et al.* Nature and duration of growth factor signaling through receptor  
684 tyrosine kinases regulates HSV-1 latency in neurons. *Cell Host Microbe* **8**, 320-330,  
685 doi:10.1016/j.chom.2010.09.007 (2010).
- 686 12 Hu, H.-L. *et al.* TOP2 $\beta$ -Dependent Nuclear DNA Damage Shapes Extracellular Growth  
687 Factor Responses via Dynamic AKT Phosphorylation to Control Virus Latency. *Molecular cell* **74**,  
688 466-480.e464, doi:10.1016/j.molcel.2019.02.032 (2019).
- 689 13 Tedeschi, A. & Bradke, F. The DLK signalling pathway--a double-edged sword in neural  
690 development and regeneration. *EMBO reports* **14**, 605-614, doi:10.1038/embor.2013.64 (2013).
- 691 14 Geden, M. J. & Deshmukh, M. Axon degeneration: context defines distinct pathways.  
692 *Current opinion in neurobiology* **39**, 108-115, doi:10.1016/j.conb.2016.05.002 (2016).
- 693 15 Cliffe, A. R. *et al.* Neuronal Stress Pathway Mediating a Histone Methyl/Phospho Switch  
694 Is Required for Herpes Simplex Virus Reactivation. *Cell Host Microbe* **18**, 649-658,  
695 doi:10.1016/j.chom.2015.11.007 (2015).
- 696 16 Fischle, W. *et al.* Regulation of HP1-chromatin binding by histone H3 methylation and  
697 phosphorylation. *Nature* **438**, 1116-1122, doi:10.1038/nature04219 (2005).
- 698 17 Gehani, S. S. *et al.* Polycomb Group Protein Displacement and Gene Activation through  
699 MSK-Dependent H3K27me3S28 Phosphorylation. *Molecular Cell* **39**, 886-900,  
700 doi:10.1016/j.molcel.2010.08.020 (2010).



- 701 18 Kim, J. Y., Mandarino, A., Chao, M. V., Mohr, I. & Wilson, A. C. Transient reversal of  
702 episome silencing precedes VP16-dependent transcription during reactivation of latent HSV-1 in  
703 neurons. *PLoS Pathog* **8**, e1002540, doi:10.1371/journal.ppat.1002540 (2012).
- 704 19 Cliffe, A. R. & Wilson, A. C. Restarting Lytic Gene Transcription at the Onset of Herpes  
705 Simplex Virus Reactivation. *J Virol* **91**, e01419-01416-01416, doi:10.1128/JVI.01419-16 (2017).
- 706 20 Liang, Y., Vogel, J. L., Narayanan, A., Peng, H. & Kristie, T. M. Inhibition of the histone  
707 demethylase LSD1 blocks alpha-herpesvirus lytic replication and reactivation from latency. *Nat*  
708 *Med* **15**, 1312-1317, doi:10.1038/nm.2051 (2009).
- 709 21 Liang, Y. *et al.* Targeting the JMJD2 histone demethylases to epigenetically control  
710 herpesvirus infection and reactivation from latency. *Sci Transl Med* **5**, 167ra165,  
711 doi:10.1126/scitranslmed.3005145 (2013).
- 712 22 Messer, H. G., Jacobs, D., Dhummakupt, A. & Bloom, D. C. Inhibition of H3K27me3-  
713 specific histone demethylases JMJD3 and UTX blocks reactivation of herpes simplex virus 1 in  
714 trigeminal ganglion neurons. *J Virol* **89**, 3417-3420, doi:10.1128/JVI.03052-14 (2015).
- 715 23 Hill, J. M. *et al.* Inhibition of LSD1 reduces herpesvirus infection, shedding, and  
716 recurrence by promoting epigenetic suppression of viral genomes. *Sci Transl Med* **6**, 265ra169,  
717 doi:10.1126/scitranslmed.3010643 (2014).
- 718 24 Noh, K.-M. *et al.* ATRX tolerates activity-dependent histone H3 methyl/phos switching to  
719 maintain repetitive element silencing in neurons. *Proceedings of the National Academy of*  
720 *Sciences* **112**, 201411258-201416827, doi:10.1073/pnas.1411258112 (2014).
- 721 25 Smith, R. L., Pizer, L. I., Johnson, E. M., Jr. & Wilcox, C. L. Activation of second-messenger  
722 pathways reactivates latent herpes simplex virus in neuronal cultures. *Virology* **188**, 311-318,  
723 doi:10.1016/0042-6822(92)90760-m (1992).
- 724 26 Colgin, M. A., Smith, R. L. & Wilcox, C. L. Inducible Cyclic AMP Early Repressor Produces  
725 Reactivation of Latent Herpes Simplex Virus Type 1 in Neurons In Vitro. *Journal of Virology* **75**,  
726 2912-2920, doi:10.1128/JVI.75.6.2912-2920.2001 (2001).
- 727 27 De Regge, N., Van Opendenbosch, N., Nauwynck, H. J., Efstathiou, S. & Favoreel, H. W.  
728 Interferon Alpha Induces Establishment of Alphaherpesvirus Latency in Sensory Neurons In  
729 Vitro. *PLoS ONE* **5**, e13076, doi:10.1371/journal.pone.0013076.t001 (2010).
- 730 28 Danaher, R. J., Jacob, R. J. & Miller, C. S. Herpesvirus quiescence in neuronal cells. V:  
731 forskolin-responsiveness of the herpes simplex virus type 1 alpha0 promoter and contribution  
732 of the putative cAMP response element. *J Neurovirol* **9**, 489-497,  
733 doi:10.1080/13550280390218797 (2003).
- 734 29 Alt, F. W. & Schwer, B. DNA double-strand breaks as drivers of neural genomic change,  
735 function, and disease. *DNA Repair (Amst)* **71**, 158-163, doi:10.1016/j.dnarep.2018.08.019  
736 (2018).
- 737 30 Madabhushi, R. *et al.* Activity-Induced DNA Breaks Govern the Expression of Neuronal  
738 Early-Response Genes. *Cell* **161**, 1592-1605, doi:10.1016/j.cell.2015.05.032 (2015).
- 739 31 Ericsson, A., Kovacs, K. J. & Sawchenko, P. E. A functional anatomical analysis of central  
740 pathways subserving the effects of interleukin-1 on stress-related neuroendocrine neurons. *J*  
741 *Neurosci* **14**, 897-913, doi:10.1523/jneurosci.14-02-00897.1994 (1994).
- 742 32 Goshen, I. & Yirmiya, R. Interleukin-1 (IL-1): a central regulator of stress responses. *Front*  
743 *Neuroendocrinol* **30**, 30-45, doi:10.1016/j.yfrne.2008.10.001 (2009).

- 744 33 Koo, J. W. & Duman, R. S. Interleukin-1 receptor null mutant mice show decreased  
745 anxiety-like behavior and enhanced fear memory. *Neurosci Lett* **456**, 39-43,  
746 doi:10.1016/j.neulet.2009.03.068 (2009).
- 747 34 Saper, C. B. & Breder, C. D. The neurologic basis of fever. *N Engl J Med* **330**, 1880-1886,  
748 doi:10.1056/NEJM199406303302609 (1994).
- 749 35 Glaser, R. & Kiecolt-Glaser, J. K. Chronic stress modulates the virus-specific immune  
750 response to latent herpes simplex virus Type 1. *Annals of Behavioral Medicine* **19**, 78-82,  
751 doi:10.1007/BF02883323 (1997).
- 752 36 Cohen, F. *et al.* Persistent stress as a predictor of genital herpes recurrence. *Archives of*  
753 *internal medicine* **159**, 2430-2436 (1999).
- 754 37 Chida, Y. & Mao, X. Does psychosocial stress predict symptomatic herpes simplex virus  
755 recurrence? A meta-analytic investigation on prospective studies. *Brain, behavior, and*  
756 *immunity* **23**, 917-925, doi:10.1016/j.bbi.2009.04.009 (2009).
- 757 38 Roizman, B., Knipe, D. M. & Whitley, R. (Lippincott Williams & Wilkins,  
758 Philadelphia, 2013).
- 759 39 Vezzani, A. & Viviani, B. Neuromodulatory properties of inflammatory cytokines and  
760 their impact on neuronal excitability. *Neuropharmacology* **96**, 70-82,  
761 doi:10.1016/j.neuropharm.2014.10.027 (2015).
- 762 40 Schneider, H. *et al.* A neuromodulatory role of interleukin-1beta in the hippocampus.  
763 *Proceedings of the National Academy of Sciences* **95**, 7778-7783 (1998).
- 764 41 Binshtok, A. M. *et al.* Nociceptors are interleukin-1beta sensors. *J Neurosci* **28**, 14062-  
765 14073, doi:10.1523/JNEUROSCI.3795-08.2008 (2008).
- 766 42 Orzalli, M. H. *et al.* An Antiviral Branch of the IL-1 Signaling Pathway Restricts Immune-  
767 Evasive Virus Replication. *Molecular Cell* **71**, 825-840.e826, doi:10.1016/j.molcel.2018.07.009  
768 (2018).
- 769 43 Aarreberg, L. D. *et al.* Interleukin-1 $\beta$  Induces mtDNA Release to Activate Innate Immune  
770 Signaling via cGAS-STING. *Molecular Cell*, doi:10.1016/j.molcel.2019.02.038 (2019).
- 771 44 Benboudjema, L., Mulvey, M., Gao, Y., Pimplikar, S. W. & Mohr, I. Association of the  
772 Herpes Simplex Virus Type 1 Us11 Gene Product with the Cellular Kinesin Light-Chain-Related  
773 Protein PAT1 Results in the Redistribution of Both Polypeptides. *Journal of Virology* **77**, 9192-  
774 9203, doi:10.1128/jvi.77.17.9192-9203.2003 (2003).
- 775 45 Hoshi, T., Garber, S. S. & Aldrich, R. W. Effect of forskolin on voltage-gated K<sup>+</sup> channels  
776 is independent of adenylate cyclase activation. *Science* **240**, 1652-1655 (1988).
- 777 46 Kandel, E. R. The molecular biology of memory: cAMP, PKA, CRE, CREB-1, CREB-2, and  
778 CPEB. *Mol Brain* **5**, 14, doi:10.1186/1756-6606-5-14 (2012).
- 779 47 de Rooij, J. *et al.* Mechanism of regulation of the Epac family of cAMP-dependent  
780 RapGEFs. *J Biol Chem* **275**, 20829-20836, doi:10.1074/jbc.M001113200 (2000).
- 781 48 Gandia, L. *et al.* Differential effects of forskolin and 1,9-dideoxy-forskolin on nicotinic  
782 receptor- and K<sup>+</sup>-induced responses in chromaffin cells. *Eur J Pharmacol* **329**, 189-199,  
783 doi:https://doi.org/10.1016/S0014-2999(97)89180-7 (1997).
- 784 49 Haslam, R. J., Davidson, M. M. & Desjardins, J. V. Inhibition of adenylate cyclase by  
785 adenosine analogues in preparations of broken and intact human platelets. Evidence for the  
786 unidirectional control of platelet function by cyclic AMP. *Biochem J* **176**, 83-95,  
787 doi:10.1042/bj1760083 (1978).

- 788 50 Patel, S. *et al.* Discovery of Dual Leucine Zipper Kinase (DLK, MAP3K12) Inhibitors with  
789 Activity in Neurodegeneration Models. *Journal of Medicinal Chemistry* **58**, 141023155239000-  
790 141023155239418, doi:10.1021/jm5013984 (2014).
- 791 51 van Zeijl, M. *et al.* Novel class of thiourea compounds that inhibit herpes simplex virus  
792 type 1 DNA cleavage and encapsidation: resistance maps to the UL6 gene. *J Virol* **74**, 9054-9061,  
793 doi:10.1128/jvi.74.19.9054-9061.2000 (2000).
- 794 52 Newcomb, W. W. & Brown, J. C. Inhibition of herpes simplex virus replication by WAY-  
795 150138: assembly of capsids depleted of the portal and terminase proteins involved in DNA  
796 encapsidation. *J Virol* **76**, 10084-10088, doi:10.1128/jvi.76.19.10084-10088.2002 (2002).
- 797 53 Alandijany, T. *et al.* Distinct temporal roles for the promyelocytic leukaemia (PML)  
798 protein in the sequential regulation of intracellular host immunity to HSV-1 infection. *PLoS*  
799 *Pathogens* **14**, e1006769-1006736, doi:10.1371/journal.ppat.1006769 (2018).
- 800 54 McFarlane, S. *et al.* The histone chaperone HIRA promotes the induction of host innate  
801 immune defences in response to HSV-1 infection. *PLoS Pathogens* **15**, e1007667,  
802 doi:10.1371/journal.ppat.1007667 (2019).
- 803 55 Kruidenier, L. *et al.* A selective jumonji H3K27 demethylase inhibitor modulates the  
804 proinflammatory macrophage response. *Nature* **488**, 404-408, doi:10.1038/nature11262  
805 (2012).
- 806 56 Sartiani, L., Mannaioni, G., Masi, A., Novella Romanelli, M. & Cerbai, E. The  
807 Hyperpolarization-Activated Cyclic Nucleotide-Gated Channels: from Biophysics to  
808 Pharmacology of a Unique Family of Ion Channels. *Pharmacol Rev* **69**, 354-395,  
809 doi:10.1124/pr.117.014035 (2017).
- 810 57 Kullmann, P. H. *et al.* HCN hyperpolarization-activated cation channels strengthen  
811 virtual nicotinic EPSPs and thereby elevate synaptic amplification in rat sympathetic neurons. *J*  
812 *Neurophysiol* **116**, 438-447, doi:10.1152/jn.00223.2016 (2016).
- 813 58 DiFrancesco, D. & Tortora, P. Direct activation of cardiac pacemaker channels by  
814 intracellular cyclic AMP. *Nature* **351**, 145-147, doi:10.1038/351145a0 (1991).
- 815 59 Kase, D. & Imoto, K. The Role of HCN Channels on Membrane Excitability in the Nervous  
816 System. *J Signal Transduct* **2012**, 619747, doi:10.1155/2012/619747 (2012).
- 817 60 Ibata, K., Sun, Q. & Turrigiano, G. G. Rapid synaptic scaling induced by changes in  
818 postsynaptic firing. *Neuron* **57**, 819-826, doi:10.1016/j.neuron.2008.02.031 (2008).
- 819 61 Turrigiano, G. G., Leslie, K. R., Desai, N. S., Rutherford, L. C. & Nelson, S. B. Activity-  
820 dependent scaling of quantal amplitude in neocortical neurons. *Nature* **391**, 892-896,  
821 doi:10.1038/36103 (1998).
- 822 62 Lee, H. K. & Kirkwood, A. Mechanisms of Homeostatic Synaptic Plasticity in vivo. *Front*  
823 *Cell Neurosci* **13**, 520, doi:10.3389/fncel.2019.00520 (2019).
- 824 63 Sokolova, I. V. & Mody, I. Silencing-induced metaplasticity in hippocampal cultured  
825 neurons. *J Neurophysiol* **100**, 690-697, doi:10.1152/jn.90378.2008 (2008).
- 826 64 Emery, E. C., Young, G. T., Berrocoso, E. M., Chen, L. & McNaughton, P. A. HCN2 ion  
827 channels play a central role in inflammatory and neuropathic pain. *Science* **333**, 1462-1466,  
828 doi:10.1126/science.1206243 (2011).
- 829 65 Weber, A., Wasiliew, P. & Kracht, M. Interleukin-1 (IL-1) pathway. *Sci Signal* **3**, cm1,  
830 doi:10.1126/scisignal.3105cm1 (2010).

- 831 66 Listwak, S. J., Rathore, P. & Herkenham, M. Minimal NF-kappaB activity in neurons.  
832 *Neuroscience* **250**, 282-299, doi:10.1016/j.neuroscience.2013.07.013 (2013).
- 833 67 Kaltschmidt, B. & Kaltschmidt, C. NF-kappaB in the nervous system. *Cold Spring Harb*  
834 *Perspect Biol* **1**, a001271, doi:10.1101/cshperspect.a001271 (2009).
- 835 68 Yeh, J. X., Park, E., Schultz, K. L. W. & Griffin, D. E. NF-kappaB Activation Promotes  
836 Alphavirus Replication in Mature Neurons. *J Virol* **93**, e01071-01019, doi:10.1128/JVI.01071-19  
837 (2019).
- 838 69 Qian, J. *et al.* Interleukin-1R3 mediates interleukin-1-induced potassium current increase  
839 through fast activation of Akt kinase. *Proc Natl Acad Sci U S A* **109**, 12189-12194,  
840 doi:10.1073/pnas.1205207109 (2012).
- 841 70 Srinivasan, D., Yen, J. H., Joseph, D. J. & Friedman, W. Cell type-specific interleukin-1beta  
842 signaling in the CNS. *J Neurosci* **24**, 6482-6488, doi:10.1523/JNEUROSCI.5712-03.2004 (2004).
- 843 71 Mrak, R. E. & Griffin, W. S. Interleukin-1, neuroinflammation, and Alzheimer's disease.  
844 *Neurobiol Aging* **22**, 903-908, doi:10.1016/s0197-4580(01)00287-1 (2001).
- 845 72 Doll, J. R., Hoebe, K., Thompson, R. L. & Sawtell, N. M. Resolution of herpes simplex virus  
846 reactivation in vivo results in neuronal destruction. *PLoS Pathog* **16**, e1008296,  
847 doi:10.1371/journal.ppat.1008296 (2020).
- 848 73 Koyuncu, O. O., MacGibeny, M. A., Hogue, I. B. & Enquist, L. W. Compartmented  
849 neuronal cultures reveal two distinct mechanisms for alpha herpesvirus escape from genome  
850 silencing. *PLoS Pathogens* **13**, e1006608, doi:10.1371/journal.ppat.1006608 (2017).
- 851 74 Xie, F. *et al.* Identification of a Potent Inhibitor of CREB-Mediated Gene Transcription  
852 with Efficacious in Vivo Anticancer Activity. *J Med Chem* **58**, 5075-5087,  
853 doi:10.1021/acs.jmedchem.5b00468 (2015).
- 854 75 Riccio, A., Ahn, S., Davenport, C. M., Blendy, J. A. & Ginty, D. D. Mediation by a CREB  
855 family transcription factor of NGF-dependent survival of sympathetic neurons. *Science* **286**,  
856 2358-2361 (1999).

857

858

859

860

861

862

863

864

865

866

867 Supplemental Tables of Reagents

868 Table S1: Compounds Used and Concentrations

| Compound           | Supplier        | Identifier | Concentration          |
|--------------------|-----------------|------------|------------------------|
| Acycloguanosine    | Millipore Sigma | A4669      | 10 $\mu$ M, 50 $\mu$ M |
| FUDR               | Millipore Sigma | F-0503     | 20 $\mu$ M             |
| Uridine            | Millipore Sigma | U-3003     | 20 $\mu$ M             |
| SP600125           | Millipore Sigma | S5567      | 20 $\mu$ M             |
| GNE-3511           | Millipore Sigma | 533168     | 4 $\mu$ M              |
| GSK-J4             | Millipore Sigma | SML0701    | 2 $\mu$ M              |
| L-Glutamic Acid    | Millipore Sigma | G5638      | 3.7 $\mu$ g/mL         |
| Forskolin          | Tocris          | 1099       | 60 $\mu$ M             |
| LY 294002          | Tocris          | 1130       | 20 $\mu$ M             |
| 666-15             | Tocris          | 5661       | 2 $\mu$ M              |
| SQ 22,536          | Tocris          | 1435       | 50 $\mu$ M             |
| KT 5720            | Tocris          | 1288       | 3 $\mu$ M              |
| TEA                | Tocris          | 3068       | 10 mM                  |
| CsCl               | Tocris          | 4739       | 3 mM                   |
| OG-L002            | Tocris          | 6244       | 15 $\mu$ M, 30 $\mu$ M |
| S2101              | Tocris          | 5714       | 10 $\mu$ M, 20 $\mu$ M |
| Tetrodotoxin       | Tocris          | 1069       | 1 $\mu$ M              |
| ESI-09             | Tocris          | 4773       | 10 $\mu$ M             |
| ZD 7288            | Cayman          | 15228      | 20 $\mu$ M             |
| 8-bromo-cyclic AMP | Cayman          | 14431      | 125 $\mu$ M            |

|             |                 |          |           |
|-------------|-----------------|----------|-----------|
| NGF 2.5S    | Alomone Labs    | N-100    | 50 ng/mL  |
| Primocin    | Invivogen       | ant-pm-1 | 100 µg/mL |
| Aphidicolin | AG Scientific   | A-1026   | 3.3 µg/mL |
| IL-1β       | Shenandoah Bio. | 100-167  | 30ng/mL   |
| WAY-150138  | Pfizer          | NA       | 10 µg/mL  |

---

869

870

871 Table S2: Primers Used for RT-qPCR

872

---

| Primer   | Sequence 5' to 3'               |
|----------|---------------------------------|
| mGAP     | CAT GGC CTT CCG TGT GTT CCT A   |
| 1SF      |                                 |
| mGAP     | GCG GCA CGT CAG ATC CA          |
| 1SR      |                                 |
| ICP27 F  | GCA TCC TTC GTG TTT GTC ATT CTG |
| ICP27 R  | GCA TCT TCT CTC CGA CCC CG      |
| ICP8 1SF | GGA GGT GCA CCG CAT ACC         |
| ICP8 1SR | GGC TAA AAT CCG GCA TGA AC      |
| ICP4 F   | TGC TGC TGC TGT CCA CGC         |
| ICP4 R   | CGG TGT TGA CCA CGA TGA GCC     |
| UL30 F   | CGC GCT TGG CGG GTA TTA ACA T   |
| UL30 R   | TGG GTG TCC GGC AGA ATA AAG C   |

---

---

|         |                             |
|---------|-----------------------------|
| UL48 F  | TGC TCG CGA ATG TGG TTT AG  |
| UL48 R  | CTG TTC CAG CCC TTC ATG TT  |
| gC #1 F | GAG TTT GTC TGG TTC GAG GAC |
| gC #1R  | ACG GTA GAG ACT GTG GTG AA  |

---

873

874

875 Table S3: Antibodies Used for Western Blotting and Concentrations

876

---

| Antibody                                          | Supplier  | Identifier | Concentration |
|---------------------------------------------------|-----------|------------|---------------|
| Rb Phospho-Akt (S473)                             | CST       | 4060       | 1:500         |
| Rb Akt (pan)                                      | CST       | C67E7      | 1:1000        |
| Rb Phospho-c-Jun (S73)                            | CST       | 3270       | 1:500         |
| Ms Monoclonal $\alpha$ -Tubulin                   | Millipore | T9026      | 1:2500        |
|                                                   | Sigma     |            |               |
| HRP Goat Anti-Rabbit IgG Antibody<br>(Peroxidase) | Vector    | PI-1000    | 1:10000       |
| HRP Horse Anti-Mouse IgG<br>Antibody (Peroxidase) | Vector    | PI-2000    | 1:10000       |

---

877

878

879 Table S4: Antibodies Used for Immunofluorescence and Concentrations

880

| Antibody                                                         | Supplier        | Identifier  | Concentration |
|------------------------------------------------------------------|-----------------|-------------|---------------|
| Rb H3K9me3S10P                                                   | Abcam           | ab5819      | 1:250         |
| Ch Beta-III Tubulin                                              | Millipore sigma | AB9354      | 1:1000        |
| Ms $\gamma$ H2A.X                                                | CST             | 80312S      | 1:100         |
| Ms c-Fos                                                         | Novus           | NB110-75039 | 1:125         |
| F(ab') <sub>2</sub> Goat anti Mouse IgG (H+L) Alexa Fluor® 647   | Thermo Fisher   | A21237      | 1:1000        |
| F(ab') Goat anti Rabbit IgG (H+L) Alexa Fluor® 555               | Thermo Fisher   | A21425      | 1:1000        |
| Goat anti Chicken IgY (H+L) Alexa Fluor® 647                     | abcam           | ab150175    | 1:1000        |
| Goat Anti-Chicken IgY H&L (Alexa Fluor® 488) preabsorbed         | abcam           | ab150173    | 1:1000        |
| F(ab') <sub>2</sub> Goat anti-Rabbit IgG (H+L) Alexa Fluor® 488) | Thermo Fisher   | B40922      | 1:1000        |

881

882

883

884
